# Supplementary material
Source: publisher site journal article supplement (https://www.degruyterbrill.com/publication/isbn/9783110350906/downloadAsset/9783110350906_List-of-Figures-and-Tables.pdf)
Supplement: Supplementary file 1 [file 9783110350906_List-of-Figures-and-Tables.pdf]

# **Semantik**

Sebastian Löbner

ISBN: 978-3-11-034815-6

© 2015 Walter de Gruyter GmbH, Berlin/Boston

**Abbildungsübersicht / List of Figures**

**Tabellenübersicht / List of Tables**

| Bedeutungsebene            | Definition                                                                                                                                   |
|----------------------------|----------------------------------------------------------------------------------------------------------------------------------------------|
| <b>Ausdrucksbedeutung</b>  | Bedeutung eines einfachen oder zusammengesetzten Ausdrucks für sich genommen                                                                 |
| <b>Äußerungsbedeutung</b>  | Bedeutung, die ein einfacher oder zusammengesetzter Ausdruck durch die Festlegung seiner Referenz in einem gegebenen Äußerungskontext erhält |
| <b>Kommunikativer Sinn</b> | Bedeutung einer Äußerung als kommunikative Handlung in einer gegebenen sozialen Konstellation                                                |

**Tab. 1.1:** Die drei Bedeutungsebenen

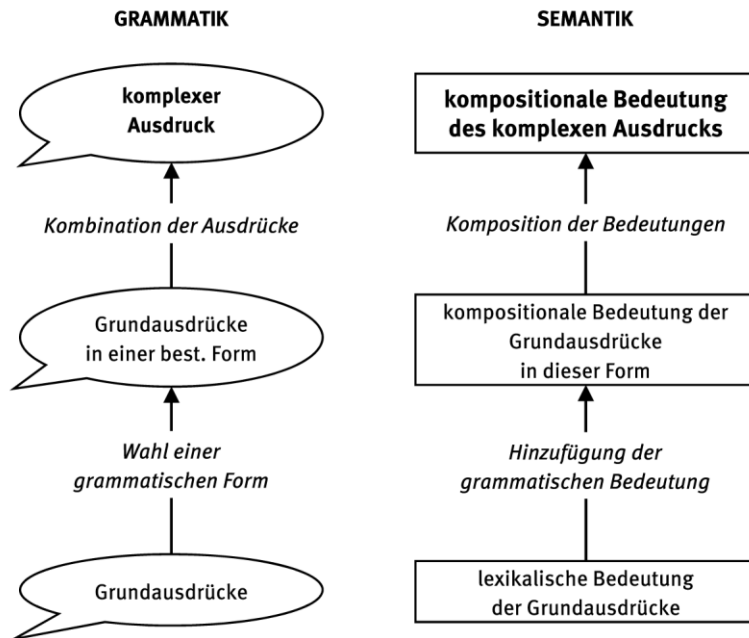

**Abb. 1.1:** Grammatischer Aufbau und Bedeutungskomposition erfolgen parallel

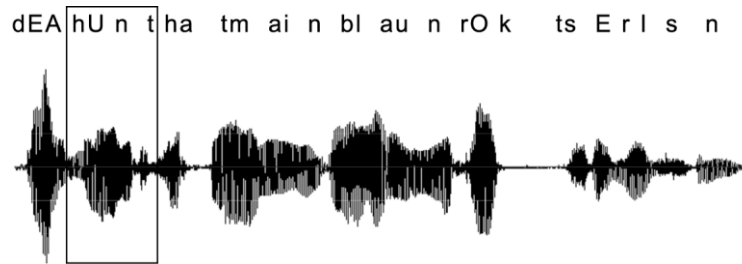

**Abb. 2.1:** Wellenform des gesprochenen Satzes „Der Hund hat meinen blauen Rock zerrissen“

| referierendes Satzelement | Typ         | Referent                              | Typ      |
|---------------------------|-------------|---------------------------------------|----------|
| <i>der Hund</i>           | NP          | der Hund ( Bobby)                     | Objekt   |
| <i>meinen blauen Rock</i> | NP          | der blaue Rock der Sprecherin (Sarah) | Objekt   |
| <i>meinen</i>             | Poss.pron.  | Sprecherin (Sarah)                    | Objekt   |
| <i>zerreiß-</i>           | Verb        | das Zerreißen des Rocks               | Ereignis |
| <i>Perfekt</i>            | gramm. Form | Äußerungszeit                         | Zeit     |

**Tab. 2.1:** Die fünf Referenten von Satz (1)

| Ausdruck                                                 | Art      | deskriptive Bedeutung                                                                                                               | Referent  |
|----------------------------------------------------------|----------|-------------------------------------------------------------------------------------------------------------------------------------|-----------|
| <i>Rock</i>                                              | Nomen    | ›Kleidungsstück für Frauen und Mädchen, das von der Taille an abwärts (in unterschiedlicher Länge) den Körper bedeckt‹ <sup>D</sup> | Objekt    |
| <i>zerreißen</i>                                         | Verb     | ›mit Gewalt in Stücke reißen; auseinander reißen‹ <sup>D</sup>                                                                      | Ereignis  |
| <i>blau</i>                                              | Adjektiv | ›von der Farbe des wolkenlosen Himmels‹ <sup>D</sup>                                                                                | Objekt    |
| <i>der</i>                                               | Artikel  | der Referent der NP ist im ÄK eindeutig bestimmt                                                                                    | –         |
| <i>mein</i>                                              | Pronomen | der Referent der NP ordnet sich der Sprecherin bzw. dem Sprecher der Äußerung zu                                                    | Objekt    |
| <i>der Hund hat<br/>meinen blauen<br/>Rock zerrissen</i> | Satz     | siehe (2)                                                                                                                           | Situation |

**Tab. 2.2:** Deskriptive Bedeutungen in Satz (1)

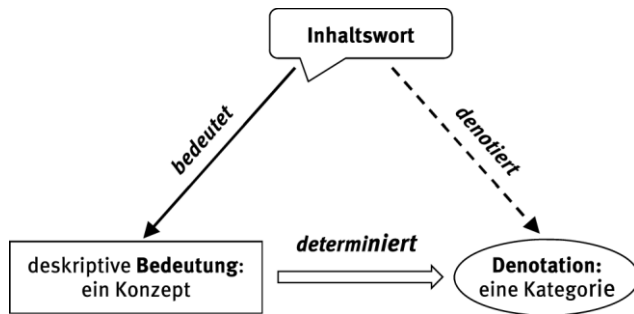

**Abb. 2.2:** Das semiotische Dreieck für Inhaltswörter allgemein

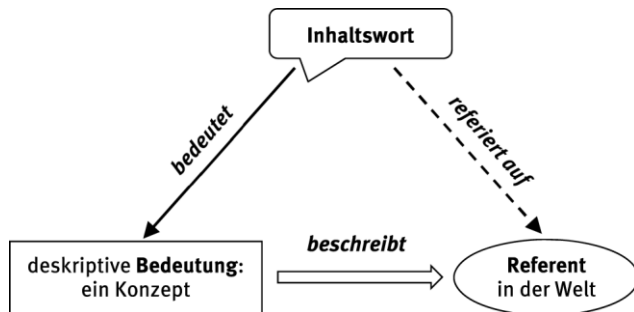

**Abb. 2.3:** Das semiotische Dreieck für den korrekten Gebrauch eines Inhaltswortes



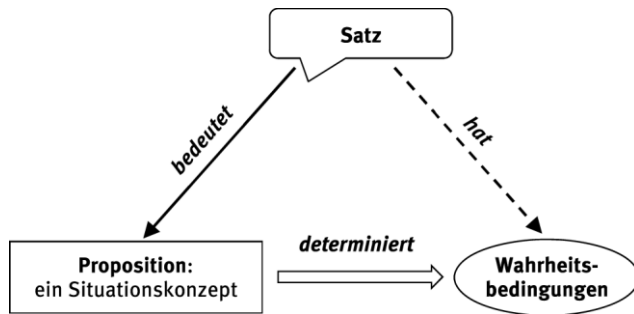

**Abb. 2.4:** Das semiotische Dreieck für Sätze

| Ausdruck         | Typ                              | soziale Bedeutung      | deskriptive Bedeutung             |
|------------------|----------------------------------|------------------------|-----------------------------------|
| <i>du</i>        | Anredepronomen                   | formloser Umgang       | ›die angesprochene Person‹        |
| <i>Sie</i>       | Anredepronomen                   | förmlicher Umgang      | ›die angesprochene(n) Person(en)‹ |
| <i>you</i>       | Anredepronomen                   | –                      | [wie dt. Sie]                     |
| <i>Sarah</i>     | Vorname als Anrede               | formloser Umgang       | ›die Person namens Sarah‹         |
| <i>Herr Kuhn</i> | Titel und Nachname<br>als Anrede | förmlicher Umgang      | ›der Mann mit Nachnamen Kuhn‹     |
| <i>bitte</i>     | Adverb                           | förmliche Aufforderung | –                                 |
| <i>Tschüss!</i>  | vollständige Äußerung            | formloser Abschied     | –                                 |

**Tab. 2.3:** Soziale Bedeutungen

| Schimpfwort                                                                                                       | deskriptive Bedeutung |
|-------------------------------------------------------------------------------------------------------------------|-----------------------|
| <i>Rindvieh, Depp, Idiot, Trottel, Tölpel, Kindskopf, Flasche, Arsch, Arschloch, Drecksau, Schwein, Miststück</i> | ›Person‹              |
| <i>Blödmann, Fatzke, Wichser, Memme, Pfeife, Affe, Schweinepriester</i>                                           | ›Mann‹                |
| <i>Tusse, Zicke, Schlampe</i>                                                                                     | ›Frau‹                |
| <i>Gör, Blag</i>                                                                                                  | ›Kind‹                |

**Tab. 2.4:** Schimpfwörter für Personen

| Ausdruck          | Typ          | expressive Bedeutung | deskriptive Bedeutung |
|-------------------|--------------|----------------------|-----------------------|
| <i>ih!</i>        | Interjektion | Ekel                 | –                     |
| <i>bescheuert</i> | Adjektiv     | Ablehnung            | –                     |
| <i>leider</i>     | Adverb       | Bedauern             | –                     |
| <i>Depp</i>       | Nomen        | Verachtung           | ›Person‹              |
| <i>Pfote</i>      | Nomen        | emotionale Emphase   | ›Hand‹                |
| <i>Schatz</i>     | Nomen        | Zuneigung            | ›Person‹              |
| <i>futtern</i>    | Verb         | emotionale Emphase   | ›essen‹               |

**Tab. 2.5:** Expressive Bedeutung

| Dimension                    | Funktion                                                                     | Verwendungsbedingungen                                                    |
|------------------------------|------------------------------------------------------------------------------|---------------------------------------------------------------------------|
| <b>deskriptive Bedeutung</b> | Beschreibung von Referenten und Situationen                                  | Übereinstimmung mit den Fakten                                            |
| <b>soziale Bedeutung</b>     | Anzeige sozialer Beziehungen und Vollzug spezifischer sozialer Interaktionen | Übereinstimmung mit spezifischen sozialen Regeln                          |
| <b>expressive Bedeutung</b>  | unmittelbarer Ausdruck persönlicher Gefühle, Bewertungen, Einstellungen      | Übereinstimmung mit den persönlichen Gefühlen, Bewertungen, Einstellungen |

**Tab. 2.6:** Bedeutungsdimensionen

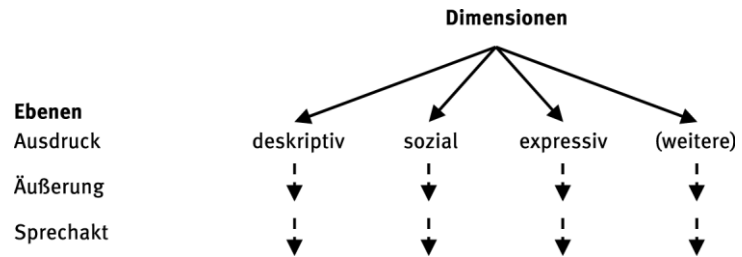

**Abb. 2.5:** Dimensionen und Ebenen der Bedeutung

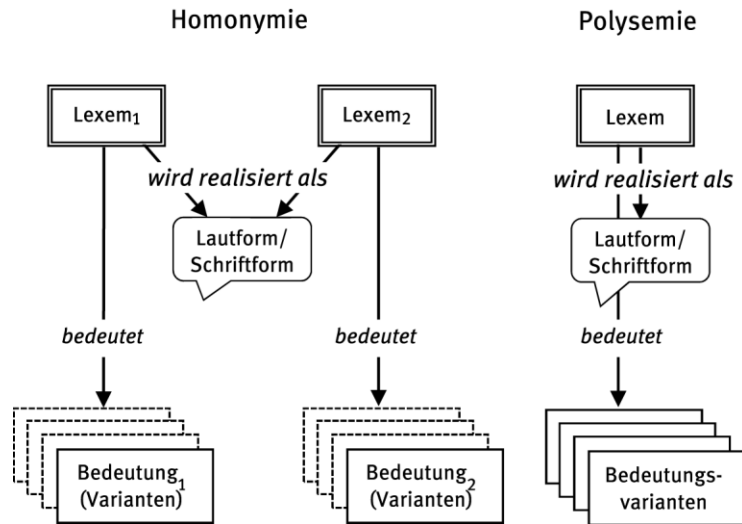

**Abb. 3.1:** Homonymie und Polysemie

|                        | wörtliche Bedeutung                                                      |   | verschobene Bedeutung                                                                      |
|------------------------|--------------------------------------------------------------------------|---|--------------------------------------------------------------------------------------------|
| <b>Metonymie</b>       | <i>die <u>Universität</u> liegt im Süden</i><br>›Universität als Kampus‹ | → | ›Universitätsgelände‹<br>Verlagerung des Konzepts auf eine seiner Komponente               |
| <b>Metapher</b>        | <i>sie können <u>die Sterne</u> sehen</i><br>›die Sterne sehen‹          | → | ›sich Schriftstellerruhm vorstellen‹<br>Verschiebung des Konzepts in einen anderen Bereich |
| <b>Differenzierung</b> | <i>einen Freund <u>verlieren</u></i><br>›einen Freund aufhören zu haben‹ | → | ›aufhören einen Freund als Freund zu haben‹<br>Hinzufügung einer Spezifikation zum Konzept |

**Tab. 3.1:** Drei Typen von Bedeutungsverschiebungen



| Person | Singular   |            |           | Plural     | soziale Bedeutung |
|--------|------------|------------|-----------|------------|-------------------|
| 1      | <i>ich</i> |            |           | <i>wir</i> |                   |
| 2      | <i>du</i>  |            |           | <i>ihr</i> | formlos           |
|        | <i>Sie</i> |            |           |            | förmlich          |
| 3      | <i>er</i>  | <i>sie</i> | <i>es</i> | <i>sie</i> |                   |
|        | mask.      | fem.       | neutr.    |            |                   |

**Tab. 4.1:** Paradigma der deutschen Personalpronomen (Nominativ)

|        | Form                      | ein Adressat                       | mehrere Adressaten             |
|--------|---------------------------|------------------------------------|--------------------------------|
| Duzen  | 2. Person                 | 2. Singular<br><i>du störst</i>    | 2. Plural<br><i>ihr stört</i>  |
| Erzen  | <b>3. Person</b>          | 3. Singular<br><i>Er/Sie stört</i> | 3. Plural<br><i>Sie stören</i> |
| Ihrzen | <b>Plural</b>             | 2. Plural<br><i>Ihr stört</i>      | 2. Plural<br><i>Ihr stört</i>  |
| Siezen | <b>Plural + 3. Person</b> | 3. Plural<br><i>Sie stören</i>     | 3. Plural<br><i>Sie stören</i> |

**Tab. 4.2:** Strategien der förmlichen pronominalen Anrede

|               |                                                 |                 |                                                  |
|---------------|-------------------------------------------------|-----------------|--------------------------------------------------|
| <i>beb-o</i>  | ich trinke                                      | <i>beb-emos</i> | wir trinken                                      |
| <i>beb-es</i> | du trinkst                                      | <i>beb-eis</i>  | ihr trinkt                                       |
| <i>beb-e</i>  | er/sie/es trinkt,<br>Sie trinken (ein Adressat) | <i>beb-en</i>   | sie trinken,<br>Sie trinken (mehrere Adressaten) |

**Tab. 4.3:** Flexion nach Person bei spanischen Verben (Indikativ Präsens Aktiv)

---

|                |                                                   |                 |                                                  |
|----------------|---------------------------------------------------|-----------------|--------------------------------------------------|
| <i>hajó-m</i>  | mein Schiff                                       | <i>hajó-nk</i>  | unser Schiff                                     |
| <i>hajó-d</i>  | dein Schiff                                       | <i>hajó-tok</i> | euer Schiff                                      |
| <i>hajó-ja</i> | sein/ihr (fem, sg) /<br>Ihr Schiff (ein Adressat) | <i>hajó-ju</i>  | ihr (3. pl) /<br>Ihr Schiff (mehrere Adressaten) |

---

**Tab. 4.4:** Possessivaffixe im Ungarischen (Singular)

|            | nahe S       | nahe A       | weder noch   |              |
|------------|--------------|--------------|--------------|--------------|
| pronominal | <i>kore</i>  | <i>sore</i>  | <i>are</i>   | ›dies‹       |
| adnominal  | <i>kono</i>  | <i>sono</i>  | <i>ano</i>   | ›dies-‹      |
| Ortsnomen  | <i>koko</i>  | <i>soko</i>  | <i>asoko</i> | ›dieser Ort‹ |
| Adjektiv   | <i>konna</i> | <i>sonna</i> | <i>anna</i>  | ›solch-‹     |
| Adverb     | <i>kō</i>    | <i>sō</i>    | <i>ā</i>     | ›so‹         |

**Tab. 4.5:** Demonstrativa im Japanischen

| Art der Deixis   | pronominal / adverbiell                           | adnominal                 |
|------------------|---------------------------------------------------|---------------------------|
| Personaldeixis   | <i>ich, du, ...</i>                               | <i>mein Schiff</i>        |
| räumliche Deixis | <i>hier, da, dort</i><br><i>dies, der/die/das</i> | <i>dieses Schiff</i>      |
| zeitliche Deixis | <i>jetzt, morgen</i>                              | <i>das nächste Schiff</i> |

**Tab. 4.6:** Pronominale und adnominale deiktische Mittel

|                  | nicht inhärent eindeutig                                      | inhärent eindeutig                                      |
|------------------|---------------------------------------------------------------|---------------------------------------------------------|
| nicht relational | <b>sortale Begriffe</b><br><i>Junge, Hund, Rock, Stein</i>    | <b>Individualbegriffe</b><br><i>Papst, Sonne, Datum</i> |
| relational       | <b>relationale Begriffe</b><br><i>Sohn, Bein, Eigenschaft</i> | <b>Funktionalbegriffe</b><br><i>Vater, Kopf, Größe</i>  |

**Tab. 4.7:** Vier Typen von Nomen

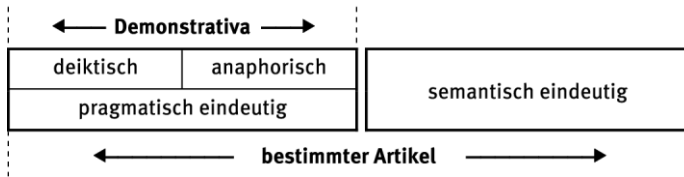

**Abb. 4.1:** Anwendungsbereiche von Demonstrativa und bestimmtem Artikel



|       | Quantifikationsbereich QB | quantifizierte Prädikation qP | Quantifikation:<br>die qP ist wahr ... |
|-------|---------------------------|-------------------------------|----------------------------------------|
| (16c) | die neun Kinder           | x soll ein Geschenk bekommen  | ... für jedes x im QB                  |
| (16d) | die neun Kinder           | für x hat Klaus noch nichts   | ... für manche x im QB                 |
| (16e) | die neun Kinder           | x darf leer ausgehen          | ... für kein x im QB                   |

**Tab. 4.8:** Komponenten der Quantifikation

| NPs der Form                                                                 | quantifizieren ...                |
|------------------------------------------------------------------------------|-----------------------------------|
| <i>jed-, all-, manche, beide</i> N<br>(echte quantifizierende NPs)           | ... immer                         |
| indefinite NP mit Mengenangabe                                               | ... bei partitiver Interpretation |
| indefinite NP mit unbestimmtem Artikel,<br>bloßer Plural, bloßes Massennomen | ... nie                           |
| definite NP                                                                  | ... nie                           |

**Tab. 4.9:** Quantifizierende und nicht quantifizierende NP-Typen

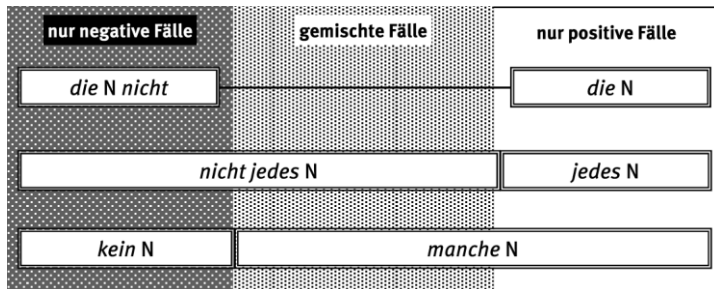

**Abb. 4.2:** Negationskontraste für definite und quantifizierende NPs

|               |                   |                       |               |                 |
|---------------|-------------------|-----------------------|---------------|-----------------|
| <i>jede</i>   | <i>der</i>        | <i>drei</i>           | <i>grünen</i> | <i>Kugeln</i>   |
| ( Quantor     | ( Determinierer   | ( Quantität           | ( Adjektiv    | ( Nomen ) ) ) ) |
| <i>jed-</i>   | <i>der</i>        | <i>eins, zwei, ..</i> |               |                 |
| <i>beide</i>  | <i>ein (Art.)</i> | <i>einig-</i>         |               |                 |
| <i>all-</i>   | <i>dies-</i>      | <i>etwas</i>          |               |                 |
| <i>manche</i> | <i>mein-</i>      | <i>ein paar</i>       |               |                 |
|               |                   | <i>viel, mehr</i>     |               |                 |
|               |                   | <i>kein-</i>          |               |                 |

**Abb. 4.3:** Die nominale Zwiebel

| definite NP           | Präsupposition                                                                                                                              |
|-----------------------|---------------------------------------------------------------------------------------------------------------------------------------------|
| Eigename              | Es gibt jemanden oder etwas, der oder das mit dem Eigennamen eindeutig gekennzeichnet ist.                                                  |
| <i>der Hund</i>       | Es gibt einen Hund und es ist eindeutig, um welchen Hund es sich handelt.                                                                   |
| <i>beim Frühstück</i> | Es gibt ein Frühstück und es ist eindeutig, um welches Frühstück es sich handelt.                                                           |
| <i>dieser Apfel</i>   | Es gibt einen Apfel, auf den deiktisch Bezug genommen wird, und es ist eindeutig, um welchen Apfel es sich handelt.                         |
| <i>mein Rock</i>      | Es gibt einen Rock, der zu der Sprecherin gehört, und es ist eindeutig, um welchen Rock es sich handelt.                                    |
| <i>ich</i>            | Es gibt jemanden, der oder die die Äußerung produziert, und es ist eindeutig, wer es ist.                                                   |
| <i>du</i>             | Es gibt jemanden, an den oder die sich die Äußerung richtet, und es ist eindeutig, an wen sie sich richtet.                                 |
| <i>er</i>             | Es gibt etwas oder jemanden, auf den damit referiert wird, und es ist eindeutig, auf wen oder was.                                          |
| <i>wir</i>            | Es gibt Personen, auf die damit referiert wird und von denen eine die Person die Sprecherin ist; es ist eindeutig, wer außerdem dazugehört. |

**Tab. 4.10:** Definite NPs und ihre Präsuppositionen

| Verb                                    | Präsupposition                                |
|-----------------------------------------|-----------------------------------------------|
| <i>sie <u>öffnete</u> die Tür</i>       | Die Tür war zuvor nicht auf.                  |
| <i>sie <u>verließ</u> die Küche</i>     | Sie war zuvor in der Küche.                   |
| <i>sie <u>ging</u> in ihr Zimmer</i>    | Sie war zuvor nicht in ihrem Zimmer           |
| <i>sie <u>legt sich hin</u></i>         | Sie lag zuvor nicht.                          |
| <i>sie <u>wurde ruhiger</u></i>         | Sie war zuvor nicht so ruhig.                 |
| <i>sie <u>hörte auf</u> zu grübeln</i>  | Sie grübelte zuvor.                           |
| <i>sie <u>nahm</u> ihre Gitarre</i>     | Sie hatte die Gitarre zuvor nicht.            |
| <i>sie <u>trank</u> ein Glas Wasser</i> | Sie hatte dieses Wasser noch nicht getrunken. |

**Tab. 4.11:** Verben und ihre Präsuppositionen

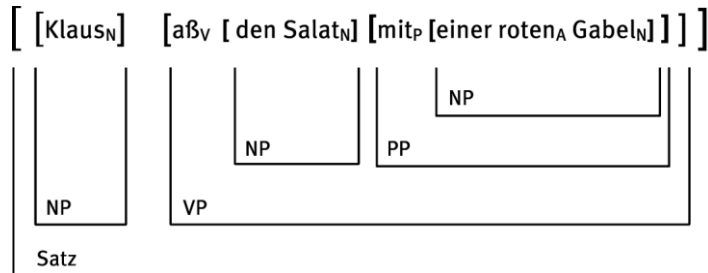

**Abb. 5.1:** Syntaktische Struktur von Satz (1)

| Inhaltswort  | Prädikationen                                                                                                              |
|--------------|----------------------------------------------------------------------------------------------------------------------------|
| <i>Klaus</i> | $r_k$ heißt Klaus                                                                                                          |
| <i>aß</i>    | $r_k$ aß [ $r_s$ mit $r_g$ ]<br>$r_s$ wurde gegessen [von $r_k$ mit $r_g$ ]<br>mit $r_g$ wird gegessen [ $r_s$ von $r_k$ ] |
| <i>Salat</i> | $r_s$ ist (ein) Salat                                                                                                      |
| <i>roten</i> | $r_g$ ist rot                                                                                                              |
| <i>Gabel</i> | $r_g$ ist eine Gabel                                                                                                       |

**Tab. 5.1:** Prädikationen in Satz (1)



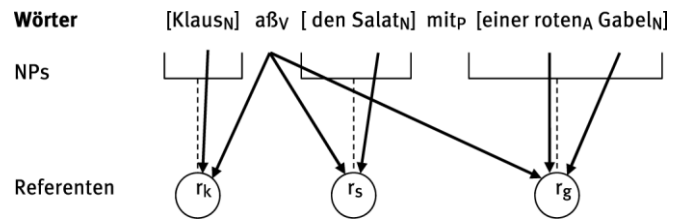

**Abb. 5.2:** Prädikationsstruktur von Satz (1)

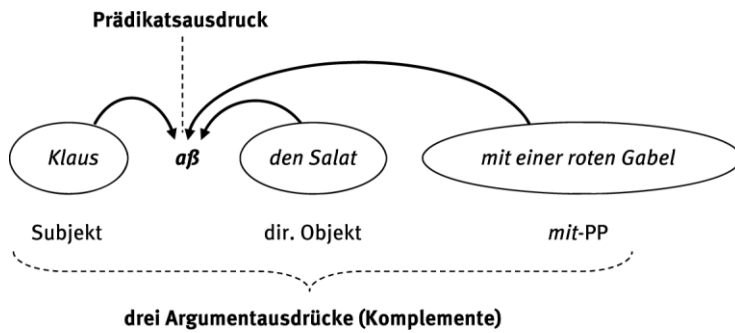

**Abb. 5.3:** Prädikatsausdruck und zugehörige Argumentausdrücke

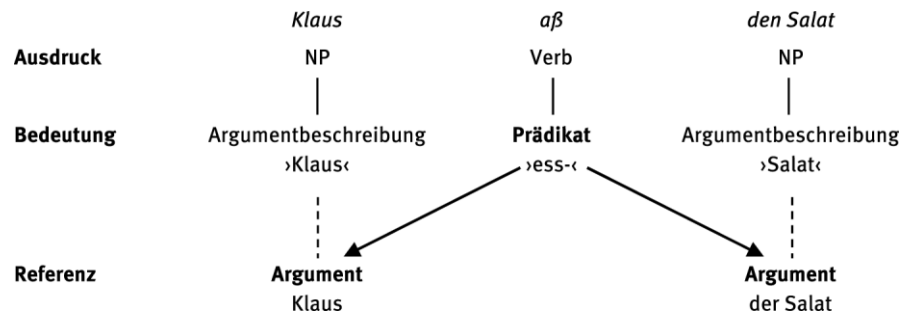

**Abb. 5.4:** Ebenen der Prädikation mittels eines Verbs

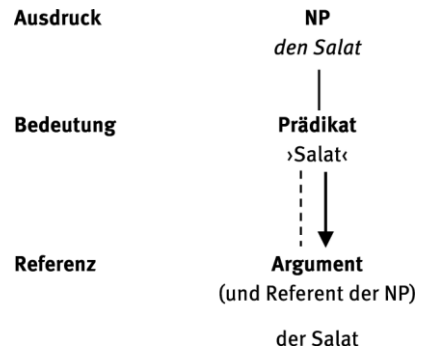

**Abb. 5.5:** Ebenen der Prädikation mittels einer NP

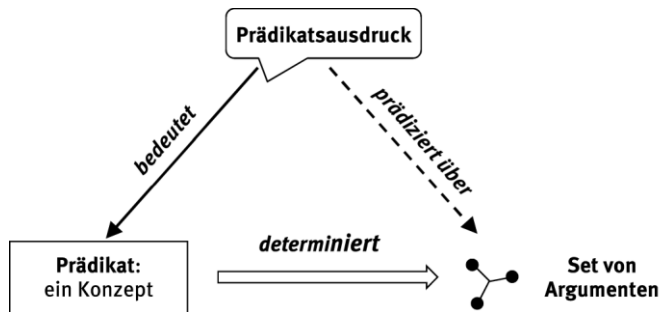

**Abb. 5.6:** Das semiotische Dreieck für Prädikationen

|                       | Prädikation   | Determination   |
|-----------------------|---------------|-----------------|
| <i>Klaus</i>          | ›heißt Klaus‹ | definit         |
| <i>sie</i> (Singular) |               | definit         |
| <i>jemand</i>         | ›Person‹      | indefinit       |
| <i>jeder</i>          |               | quantifizierend |
| <i>man</i>            | ›Person‹      | generisch       |

**Tab. 5.2:** Prädikation und Determination von Eigennamen und Pronomen

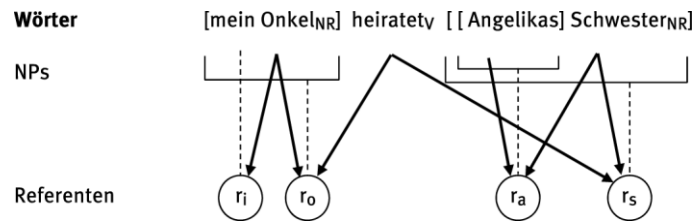

**Abb. 5.7:** Prädikationsstruktur von Satz (11)

|   | Unterart    | Beispiel                         | 1. Argument  | weitere Argumente |
|---|-------------|----------------------------------|--------------|-------------------|
| V | intransitiv | Die Klingel <b>schellte</b> .    | Komplement   | –                 |
| V | transitiv   | Sie <b>öffnete</b> die Tür.      | Komplement   | Komplement        |
| N | einstellig  | Der <b>Briefträger</b> grüßte.   | referenziell | –                 |
| N | relational  | Ist das Ihr <b>Name</b> ?        | referenziell | Possessor         |
|   |             | Eine <b>Paketsendung</b> an Sie. | referenziell | Komplement        |
| A | einstellig  | in <b>blauem</b> Papier          | parasitär    | –                 |
| A | Komparativ  | <b>kleiner</b> als das letzte    | parasitär    | Komplement        |
| A | zweistellig | aber <b>voll</b> mit Pralinen    | parasitär    | Komplement        |

**Tab. 5.3:** Typen von Prädikatsausdrücken und die Spezifikation ihrer Argumente



| Rolle                | Beschreibung                                                           | Beispiele                                                                                                                  |
|----------------------|------------------------------------------------------------------------|----------------------------------------------------------------------------------------------------------------------------|
| <b>Agens</b>         | vollzieht die Handlung                                                 | <i>Klaus schreibt einen Brief.</i><br><i>Die Katze hat ein Ei gefressen.</i>                                               |
| <b>Thema/Patiens</b> | an ihm wird die Handlung vollzogen<br>oder vollzieht sich das Ereignis | <i>Klaus schreibt <u>einen</u> Brief.</i><br><i>Die Katze hat <u>ein Ei</u> gefressen.</i><br><i>Die Tür öffnete sich.</i> |
| <b>Experiencer</b>   | nimmt wahr, empfindet                                                  | <i>Ich hörte ihn husten.</i><br><i>Dieser Anfall überraschte mich.</i>                                                     |
| <b>Instrument</b>    | Mittel einer Handlung                                                  | <i>Dieser Schlüssel öffnet die Tür.</i><br><i>Sie aß mit Stäbchen.</i>                                                     |
| <b>Ort</b>           | Ort, wo etwas ist; Ort des Geschehens                                  | <i>Der Schlüssel steckt im Schloss.</i>                                                                                    |
| <b>Ziel</b>          | Ziel einer Bewegung                                                    | <i>Leg das Buch auf die Erde.</i><br><i>Sie gab mir den Schlüssel.</i>                                                     |
| <b>Weg</b>           | Weg einer Bewegung                                                     | <i>Er ritt durch die Wüste.</i>                                                                                            |

**Tab. 5.4:** Thematische Rollen

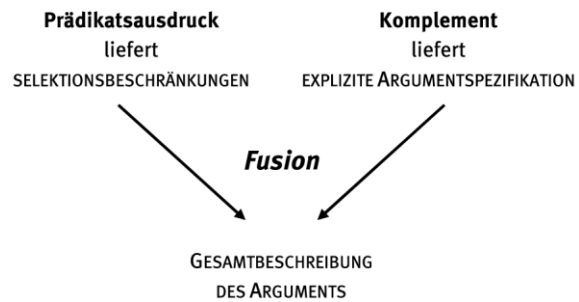

**Abb. 5.8:** Argumentbeschreibung durch Fusion

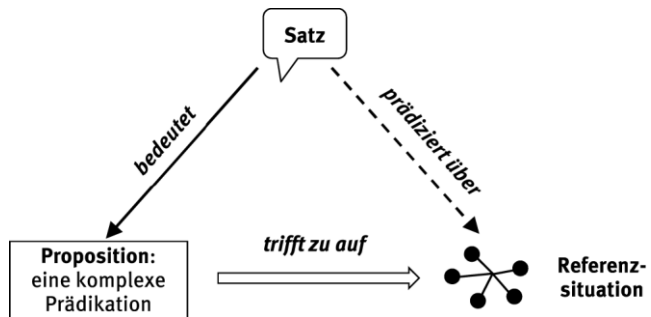

**Abb. 5.9:** Das semiotische Dreieck für den Satz als Prädikation

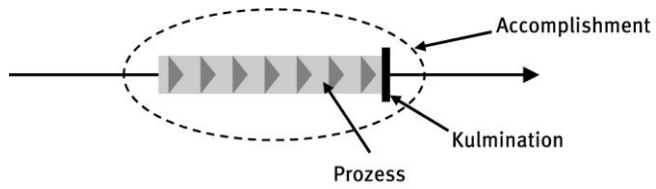

**Abb. 6.1:** Struktur eines Accomplishmentkonzepts

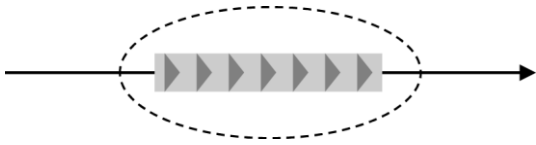

**Abb. 6.2:** Struktur eines Prozesskonzepts

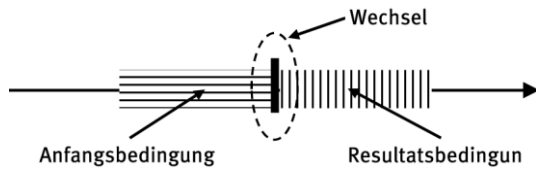

**Abb. 6.3:** Struktur eines Konzepts für einen einfachen Wechsel

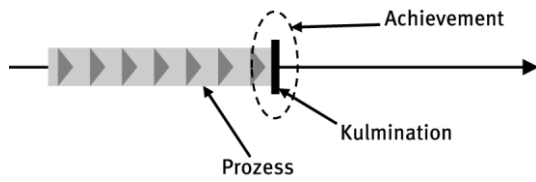

**Abb. 6.4:** Struktur eines Achievementkonzepts

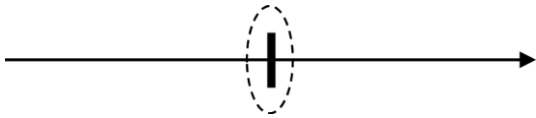

**Abb. 6.5:** Struktur eines Konzepts für ein einfaches Geschehnis



|                               | Progressiv | Zeitbedarf | Zeitdauer | Zeitpunkt |
|-------------------------------|------------|------------|-----------|-----------|
| Accomplishmentausdruck        | +          | +          | –         | –         |
| Prozessausdruck               | +          | –          | +         | –         |
| einfacher Wechselausdruck     | +          | –/+        | –         | +         |
| einfacher Geschehnis Ausdruck | –          | –          | –         | +         |

**Tab. 6.1:** Diagnostik für die vier dynamischen Verbklassen

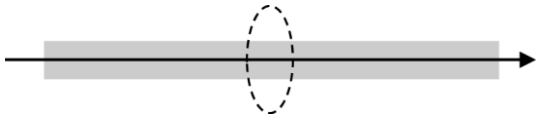

**Abb. 6.6:** Struktur eines Zustandskonzepts

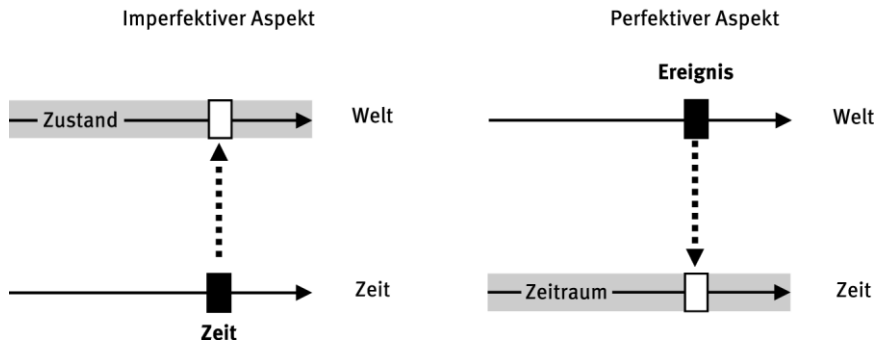

**Abb. 6.7:** Imperfektiver und perfektiver Aspekt

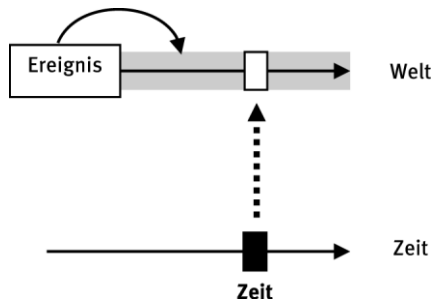

**Abb. 6.8:** Perfektaspekt

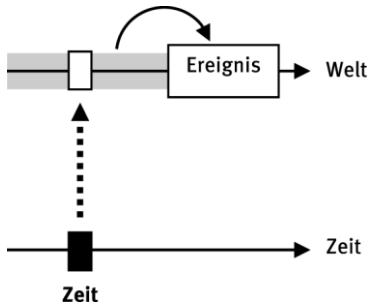

**Abb. 6.9:** Prospektiver Aspekt

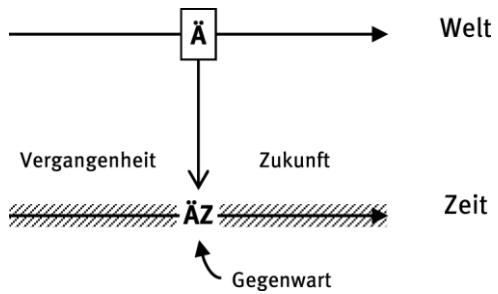

**Abb. 6.10:** Vergangenheit, Gegenwart und Zukunft

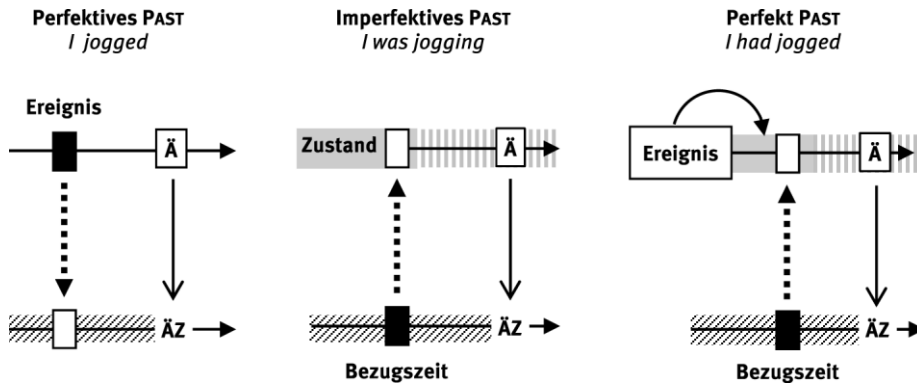

**Abb. 6.11:** Perfektives, imperfektives und Perfekt-PAST

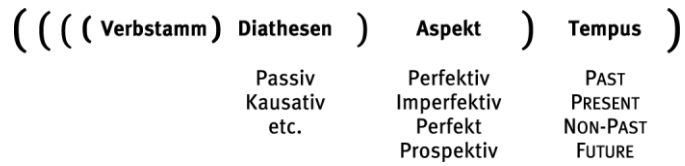

**Abb. 6.12:** Die Verbzwiebel



| Gramm. Form     | Aspekt                | Tempus   | Beispiel                      |
|-----------------|-----------------------|----------|-------------------------------|
| Präsens         | perfektiv/imperfektiv | NON-PAST | <i>er isst</i>                |
| Präteritum      | perfektiv/imperfektiv | PAST     | <i>er aß</i>                  |
| Futur I         | perfektiv/imperfektiv | FUTURE   | <i>er wird essen</i>          |
| Perfekt         | perfektiv/imperfektiv | PAST     | <i>er hat gegessen</i>        |
| Perfekt         | Perfekt               | NON-PAST | <i>er hat gegessen</i>        |
| Plusquamperfekt | Perfekt               | PAST     | <i>er hatte gegessen</i>      |
| Futur II        | Perfekt               | FUTURE   | <i>er wird gegessen haben</i> |

**Tab. 6.2:** Die wichtigsten Tempus- und Aspektformen des Deutschen und ihre Funktionen

| Satz                                   | Negation                              |
|----------------------------------------|---------------------------------------|
| Er kommt <u>immer</u> zu spät.         | Er kommt <u>nicht immer</u> zu spät.  |
| Das weiß <u>jeder</u> .                | Das weiß <u>nicht jeder</u> .         |
| Er entschuldigt sich <u>manchmal</u> . | Er entschuldigt sich <u>nie</u> .     |
| Er war <u>schon</u> da.                | Er war <u>noch nicht</u> da.          |
| Du <u>musst</u> nachhaken.             | Du <u>brauchst nicht</u> nachzuhaken. |
| <u>Nur</u> Klaus weiß warum.           | <u>Nicht nur</u> Klaus weiß warum.    |

**Tab. 7.1:** Sonderfälle der Negation im Deutschen

| A | kontingent | A | logisch wahr | A | logisch falsch |
|---|------------|---|--------------|---|----------------|
| 1 | möglich    | 1 |              | 1 | unmöglich      |
| 0 | möglich    | 0 | unmöglich    | 0 |                |

**Tab. 7.2:** Logische Eigenschaften von Sätzen

| Implikation allgemein |   |                  | einseitige Implikation |   |                  | wechselseitige Implikation |   |                  |
|-----------------------|---|------------------|------------------------|---|------------------|----------------------------|---|------------------|
| A                     | B |                  | A                      | B |                  | A                          | B |                  |
| 1                     | 1 |                  | 1                      | 1 |                  | 1                          | 1 |                  |
| 1                     | 0 | <i>unmöglich</i> | 1                      | 0 | <i>unmöglich</i> | 1                          | 0 | <i>unmöglich</i> |
| 0                     | 1 |                  | 0                      | 1 | <i>möglich</i>   | 0                          | 1 | <i>unmöglich</i> |
| 0                     | 0 |                  | 0                      | 0 |                  | 0                          | 0 |                  |

**Tab. 7.3:** Implikation und ihre Sonderfälle

A impliziert B = nicht-B impliziert nicht-A

| A | B | nicht-B | nicht-A |
|---|---|---------|---------|
| 1 | 1 | 0       | 0       |
| 1 | 0 | 1       | 0       |
| 0 | 1 | 0       | 1       |
| 0 | 0 | 1       | 1       |

**Tab. 7.4:** Umkehrung der Implikation

| A | B | $A \Rightarrow B$ | $A \Leftrightarrow B$ | Kontrarität      | Kontradiktion    |
|---|---|-------------------|-----------------------|------------------|------------------|
| 1 | 1 |                   |                       | <i>unmöglich</i> | <i>unmöglich</i> |
| 1 | 0 | <i>unmöglich</i>  | <i>unmöglich</i>      |                  |                  |
| 0 | 1 |                   | <i>unmöglich</i>      |                  |                  |
| 0 | 0 |                   |                       |                  | <i>unmöglich</i> |

**Tab. 7.5:** Logische Beziehungen zwischen Sätzen

**A logisch falsch**

| A | B |
|---|---|
| 1 | 1 |
| 1 | 0 |
| 0 | 1 |
| 0 | 0 |

*unmöglich*

*unmöglich*

**B logisch wahr**

| A | B |
|---|---|
| 1 | 1 |
| 1 | 0 |
| 0 | 1 |
| 0 | 0 |

*unmöglich*

*unmöglich*

**Tab. 7.6:** Pathologische Fälle von Implikation

| A | B | $A \Rightarrow B$ | $A \Leftrightarrow B$ | Kontrarität      | Kontradiktion    |
|---|---|-------------------|-----------------------|------------------|------------------|
| 1 | 1 | <i>möglich</i>    | <i>möglich</i>        | <i>unmöglich</i> | <i>unmöglich</i> |
| 1 | 0 | <i>unmöglich</i>  | <i>unmöglich</i>      | <i>möglich</i>   | <i>möglich</i>   |
| 0 | 1 |                   | <i>unmöglich</i>      | <i>möglich</i>   | <i>möglich</i>   |
| 0 | 0 | <i>möglich</i>    | <i>möglich</i>        |                  | <i>unmöglich</i> |

**Tab. 7.7:** Logische Beziehungen zwischen kontingenten Sätzen



| Negation |          | Konjunktion |   |                | Disjunktion |   |              | Subjunktion |   |                     |
|----------|----------|-------------|---|----------------|-------------|---|--------------|-------------|---|---------------------|
| A        | $\neg A$ | A           | B | $(A \wedge B)$ | A           | B | $(A \vee B)$ | A           | B | $(A \rightarrow B)$ |
| 1        | 0        | 1           | 1 | 1              | 1           | 1 | 1            | 1           | 1 | 1                   |
| 0        | 1        | 1           | 0 | 0              | 1           | 0 | 1            | 1           | 0 | 0                   |
|          |          | 0           | 1 | 0              | 0           | 1 | 1            | 0           | 1 | 1                   |
|          |          | 0           | 0 | 0              | 0           | 0 | 0            | 0           | 0 | 1                   |

**Tab. 7.8:** Wahrheitstafeln für aussagenlogische Verknüpfungen

| Wortart           | Testsatzschema     | Testwort       | Testsatz              |
|-------------------|--------------------|----------------|-----------------------|
| zählbares Nomen   | <i>x ist ein N</i> | <i>Auto</i>    | <i>x ist ein Auto</i> |
| Massennomen       | <i>x ist N</i>     | <i>Mehl</i>    | <i>x ist Mehl</i>     |
| Verb, intransitiv | <i>x V-t</i>       | <i>laufen</i>  | <i>x läuft</i>        |
| Verb, transitiv   | <i>x V-t y</i>     | <i>anrufen</i> | <i>x ruft y an</i>    |
| Adjektiv          | <i>x ist A</i>     | <i>kariert</i> | <i>x ist kariert</i>  |

**Tab. 7.9:** Testsätze für logische Beziehungen zwischen Prädikatsausdrücken

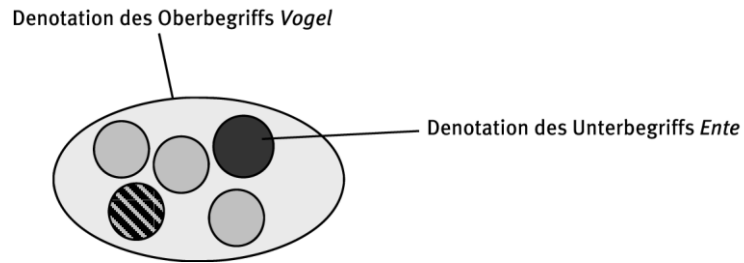

**Abb. 7.1:** Denotationen der Nomen *Vogel* und *Ente*

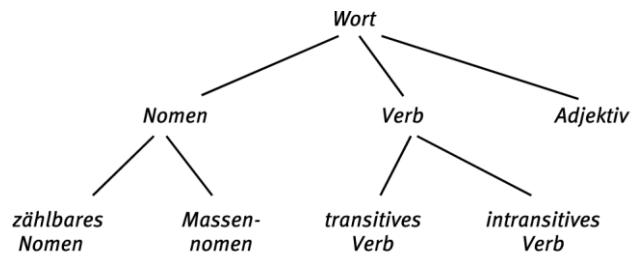

**Abb. 7.2:** Hierarchie von Wortartenbegriffen

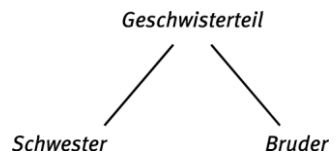

**Abb. 7.3:** Hierarchie der deutschen Geschwisterbegriffe

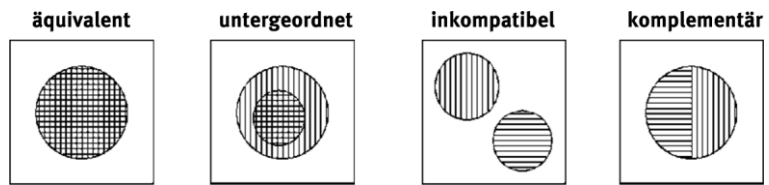

**Abb. 7.4:** Denotationsbeziehungen

| Beispiel                               | Wortbeziehung    | entsprechende Satzbeziehung | Denotationsbeziehung |
|----------------------------------------|------------------|-----------------------------|----------------------|
| <i>Person</i> – <i>Kind</i>            | Unterordnung     | Implikation                 | Teilmenge            |
| <i>Frau</i> – <i>Erwachsene</i>        | Äquivalenz       | Äquivalenz                  | identisch            |
| <i>Ente</i> – <i>Eule</i>              | Inkompatibilität | Kontrarietät                | disjunkt             |
| <i>Mitglied</i> – <i>Nichtmitglied</i> | Komplementarität | Kontradiktion               | komplementär         |

**Tab. 7.10:** Logische Beziehungen zwischen Wörtern und Sätzen

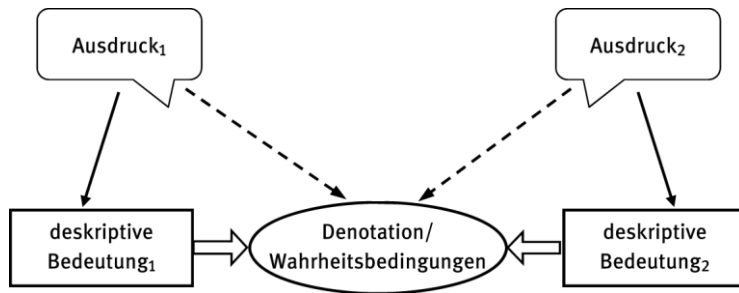

**Abb. 7.5:** Logisch äquivalente Ausdrücke mit verschiedener deskriptiver Bedeutung



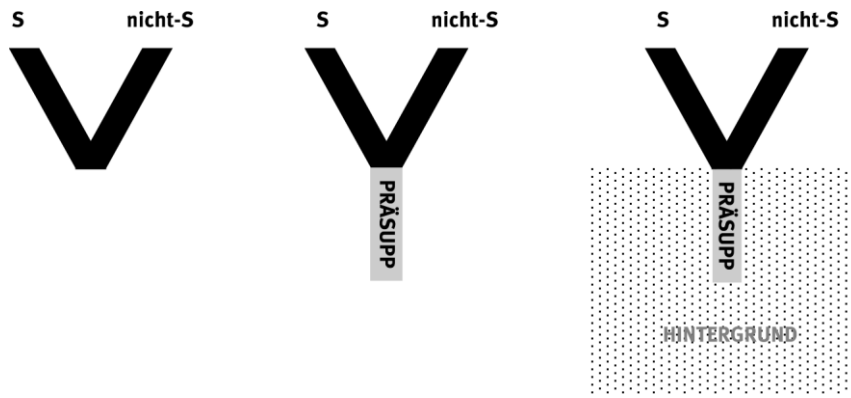

**Abb. 7.6:** Binäre, präsupponierende und kontextuelle Polarität

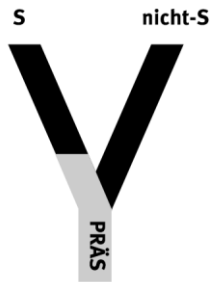

**Abb. 7.7:** Polarität bei Radikalnegation

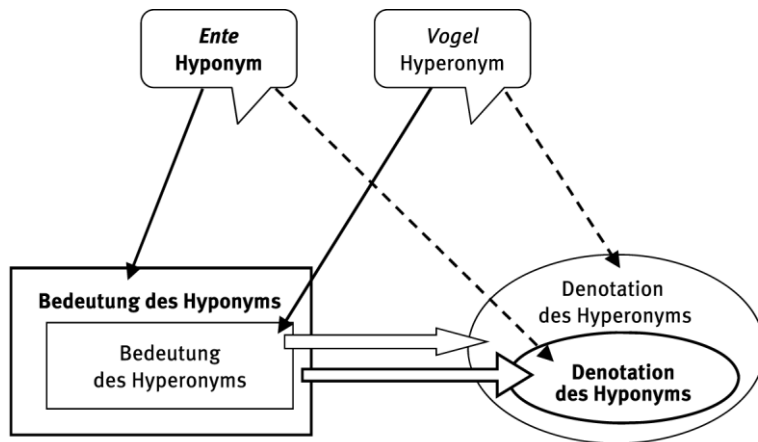

**Abb. 8.1:** Das semiotische Dreieck für Hyponym und Hyperonym

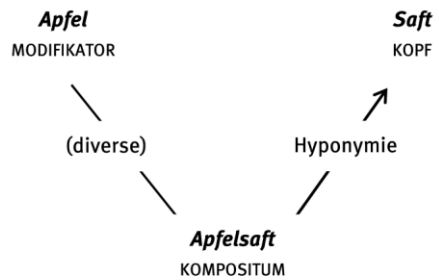

**Abb. 8.2:** Bedeutungsbeziehungen zwischen einem Kompositum und seinen Bestandteilen

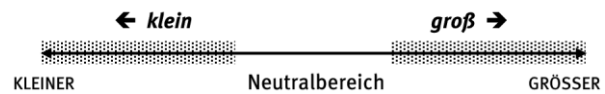

**Abb. 8.3:** Die Antonyme *klein* und *groß*

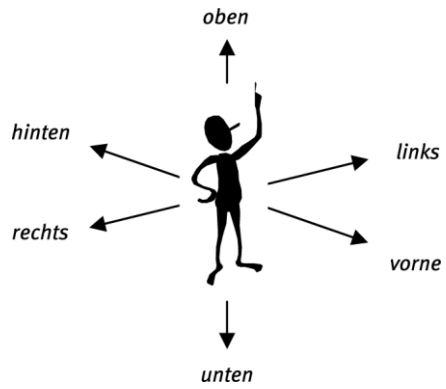

**Abb. 8.4:** Sechs Richtungen

| Beispiele       |                    | Opposition                         | Definition                                     | Log. Beziehung    |
|-----------------|--------------------|------------------------------------|------------------------------------------------|-------------------|
| <i>groß</i>     | – <i>klein</i>     | <b>Antonymie</b>                   | Gegenpole auf derselben Skala                  | inkompatibel      |
| <i>Krieg</i>    | – <i>Frieden</i>   |                                    |                                                |                   |
| <i>alles</i>    | – <i>nichts</i>    |                                    |                                                |                   |
| <i>über</i>     | – <i>unter</i>     | <b>Direktionale<br/>Opposition</b> | entgegengesetzte Richtungen auf<br>einer Achse | inkompatibel      |
| <i>vor</i>      | – <i>nach</i>      |                                    |                                                |                   |
| <i>anziehen</i> | – <i>ausziehen</i> |                                    |                                                |                   |
| <i>gerade</i>   | – <i>ungerade</i>  | <b>Komplementarität</b>            | erschöpfende Alternative                       | komplementär      |
| <i>Frau</i>     | – <i>Mann</i>      |                                    |                                                |                   |
| <i>ja</i>       | – <i>nein</i>      |                                    |                                                |                   |
| <i>Montag</i>   | – <i>Samstag</i>   | <b>Heteronymie</b>                 | mehrere Alternativen                           | inkompatibel      |
| <i>blau</i>     | – <i>weiß</i>      |                                    |                                                |                   |
| <i>drei</i>     | – <i>acht</i>      |                                    |                                                |                   |
| <i>kaufen</i>   | – <i>verkaufen</i> | <b>Konversität</b>                 | dasselbe mit vertauschten Rollen               | (unterschiedlich) |
| <i>dicker</i>   | – <i>dünn</i>      |                                    |                                                |                   |
| Aktiv           | – Passiv           |                                    |                                                |                   |

**Tab. 8.1:** Typen von Oppositionen

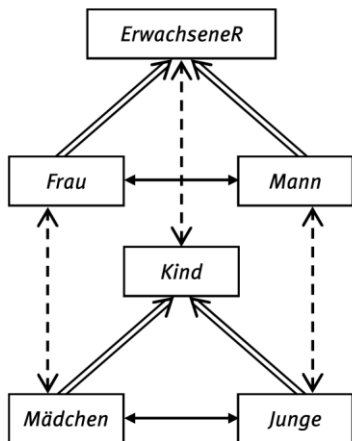

**Abb. 8.5:** Wortfeld der allgemeinen Personenbezeichnungen



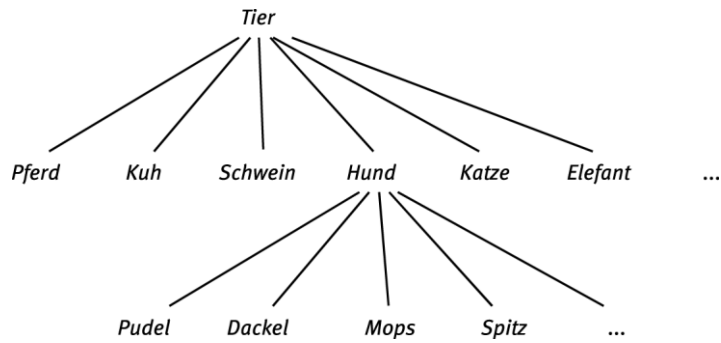

**Abb. 8.6:** Ausschnitt aus der Taxonomie der deutschen Tierbezeichnungen

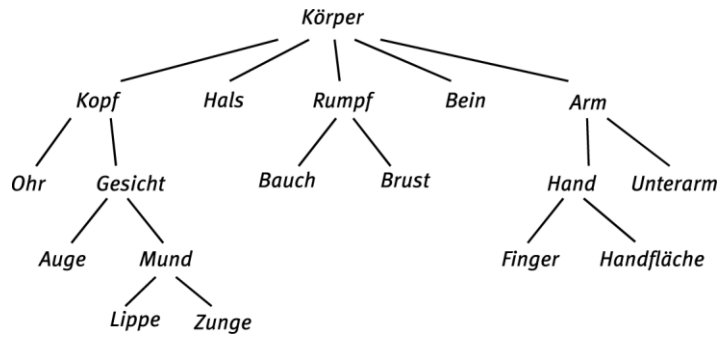

**Abb. 8.7:** Ausschnitt aus der Mereologie der deutschen Körperteilbezeichnungen

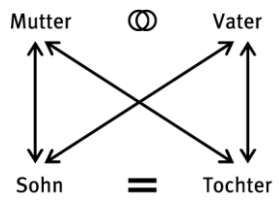

**Abb. 8.8:** Verwandtschaftsbeziehungen in der Kernfamilie

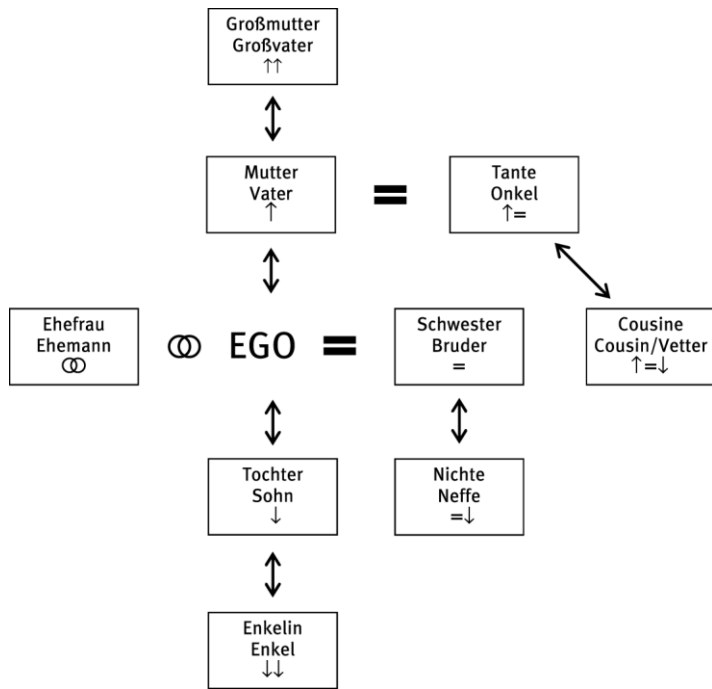

**Abb. 8.9:** Die wichtigsten deutschen Verwandtschaftsbegriffe in Code 3

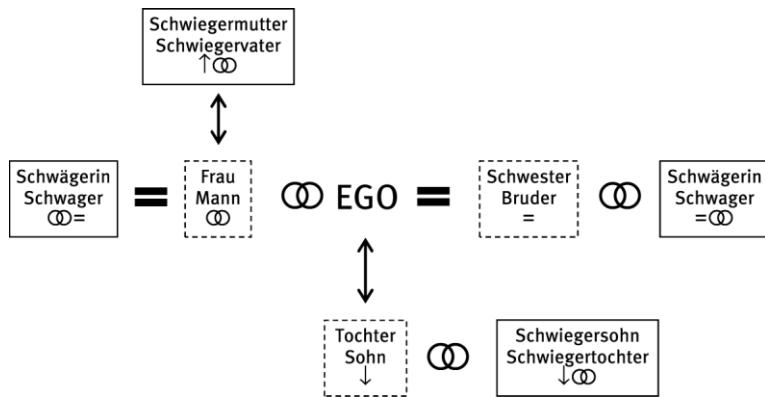

**Abb. 8.10:** Die deutschen Verwandtschaftsbegriffe für die Schwiegerverwandten in Code 3

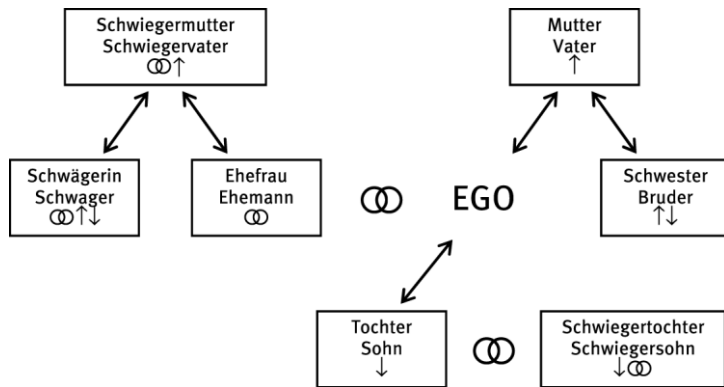

**Abb. 8.11:** Ausschnitt aus dem System der deutschen Verwandtschaftsbegriffe in Code 2

|        | <i>Schwester<br/>Bruder</i> | <i>Cousine<br/>Cousin</i> | <i>Schwägerin<br/>Schwager</i> | <i>Tante<br/>Onkel</i> | <i>Nichte<br/>Neffe</i> |
|--------|-----------------------------|---------------------------|--------------------------------|------------------------|-------------------------|
| Code 3 | =                           | ↑ = ↓                     | = ∅ od. ∅ =                    | ↑ = [∅]                | [∅] = ↓                 |
| Code 2 | ↑↓                          | ↑↑↓↓                      | ↑↓∅ od. ∅↑↓                    | ↑↑↓ [∅]                | [∅]↑↓↓                  |

**Tab. 8.2:** Code 2 vs. Code 3

| VB                                                                  | Code 1                                                                                                    | Code 2                                                                                                | Code 3                                                              |
|---------------------------------------------------------------------|-----------------------------------------------------------------------------------------------------------|-------------------------------------------------------------------------------------------------------|---------------------------------------------------------------------|
| <i>Frau/Mann</i>                                                    | ↓↑                                                                                                        | ⊗                                                                                                     | ⊗                                                                   |
| <i>Schwiegermutter<sup>✓</sup> /<br/>Schwiegervater<sup>✓</sup></i> | ↓↑↑                                                                                                       | ⊗↑                                                                                                    | ⊗↑                                                                  |
| <i>Schwiegertochter<sup>✓</sup> /<br/>Schwiegersohn<sup>✓</sup></i> | ↓↓↑                                                                                                       | ↓⊗                                                                                                    | ↓⊗                                                                  |
| <i>Schwägerin<sup>✓</sup> /<br/>Schwager<sup>✓</sup></i>            | $\left\{ \begin{array}{l} \downarrow\uparrow\downarrow \\ \uparrow\downarrow\uparrow \end{array} \right.$ | $\left\{ \begin{array}{l} \otimes\uparrow\downarrow \\ \uparrow\downarrow\otimes \end{array} \right.$ | $\left\{ \begin{array}{l} \otimes= \\ =\otimes \end{array} \right.$ |
| <i>Tante<sup>+✓</sup> / Onkel<sup>+✓</sup></i>                      | ↑↑↓↓↑                                                                                                     | ↑↑↓⊗                                                                                                  | ↑=⊗                                                                 |
| <i>Nichte<sup>+✓</sup> / Neffe<sup>+✓</sup></i>                     | ↓↑↑↓↓                                                                                                     | ⊗↑↓↓                                                                                                  | ⊗=↓                                                                 |

**Tab. 8.3:** Code 1 vs. Code 2 und Code 3



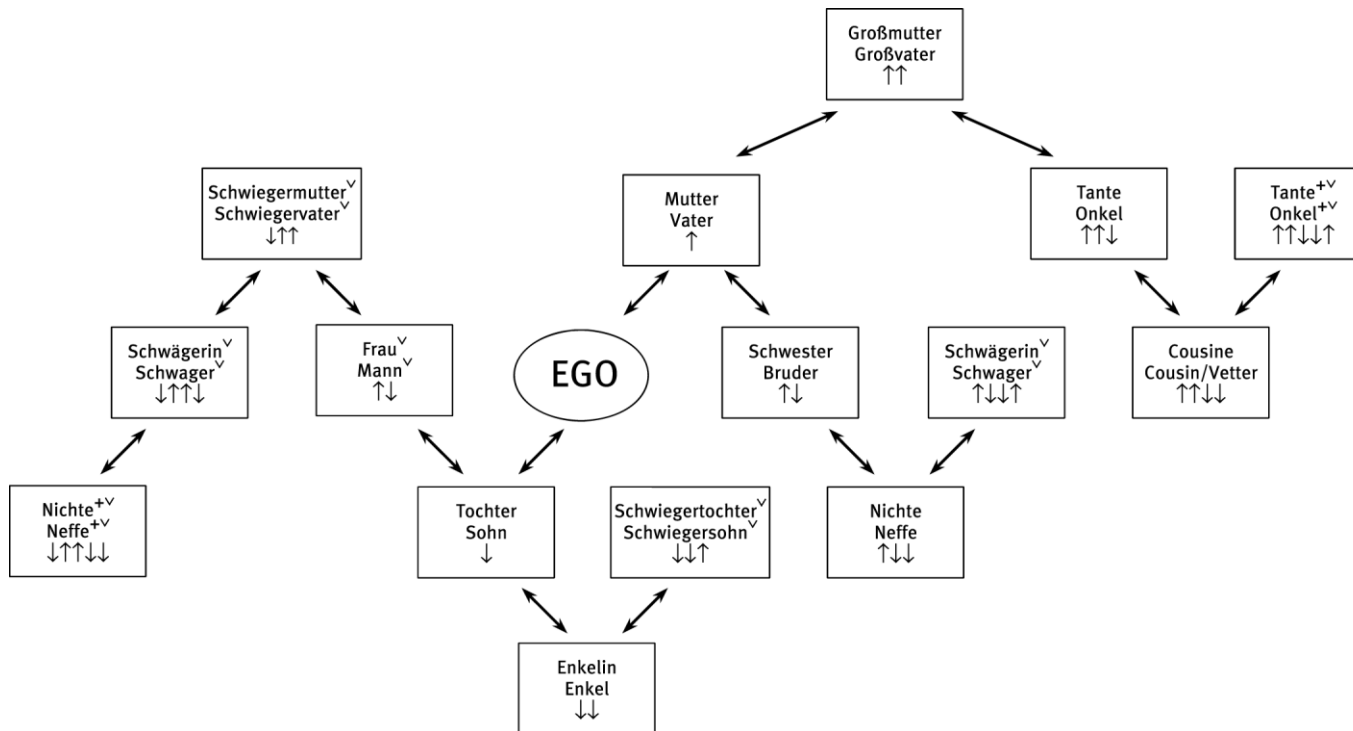

**Abb. 8.12:** Die deutschen Verwandtschaftsbegriffe auf der Basis der Eltern-Kind-Beziehung (Code 1)

| Term                         | Code 1                                                   | Code 3                    | Paraphrase             |
|------------------------------|----------------------------------------------------------|---------------------------|------------------------|
| <i>Mutter</i>                | $\uparrow w$                                             | $\uparrow w$              | weibl. E               |
| <i>Sohn</i>                  | $\downarrow m$                                           | $\downarrow m$            | männl. K               |
| <i>Schwester</i>             | $\uparrow \downarrow w$                                  | $= w$                     | weibl. G               |
| <i>Großvater</i>             | $\uparrow \uparrow m$                                    | $\uparrow \uparrow m$     | männl. E von E         |
| <i>Enkelin</i>               | $\downarrow \downarrow w$                                | $\downarrow \downarrow w$ | weibl. K von K         |
| <i>Mann</i>                  | $\downarrow \uparrow m$                                  | $\odot m$                 | männl. P               |
| <i>Schwiegermutter</i>       | $\downarrow \uparrow \uparrow w$                         | $\odot \uparrow w$        | weibl. E von P         |
| <i>Schwiegersohn</i>         | $\downarrow \downarrow \uparrow m$                       | $\downarrow \odot m$      | männl. P von K         |
| <i>Schwägerin</i>            | $\uparrow \downarrow \downarrow \uparrow w$              | $= \odot w$               | weibl. P von G         |
|                              | $\downarrow \uparrow \uparrow \downarrow w$              | $\odot = w$               | weibl. G von P         |
| <i>Onkel</i> <sup>[+]</sup>  | $\uparrow \uparrow \downarrow [\downarrow \uparrow] m$   | $\uparrow = [\odot] m$    | männl. [P von] G von E |
| <i>Nichte</i> <sup>[+]</sup> | $[\downarrow \uparrow] \uparrow \downarrow \downarrow w$ | $[\odot] = \downarrow w$  | weibl. K von G [von P] |
| <i>Cousin</i>                | $\uparrow \uparrow \downarrow \downarrow m$              | $\uparrow = \downarrow m$ | männl. K von G von E   |

**Tab. 8.4:** Bedeutung deutscher Verwandtschaftsbezeichnungen

| VB                    | Code 3               | Code 3                 | konverse VB             |
|-----------------------|----------------------|------------------------|-------------------------|
| <i>Mutter</i>         | $\uparrow$           | $\downarrow$           | <i>Tochter</i>          |
| <i>Großmutter</i>     | $\uparrow\uparrow$   | $\downarrow\downarrow$ | <i>Enkel</i>            |
| <i>Onkel</i>          | $\uparrow=[\oslash]$ | $[\oslash]=\downarrow$ | <i>Neffe</i>            |
| <i>Schwiegervater</i> | $\oslash\uparrow$    | $\downarrow\oslash$    | <i>Schwiegertochter</i> |

**Tab. 8.5:** Paare relational konverser Verwandtschaftsbezeichnungen

|                      | Verwandtschaftsbeziehung | Geschlecht | Altersrelation | soz. Bedeutung |
|----------------------|--------------------------|------------|----------------|----------------|
| Dt. <i>Bruder</i>    | ↑↓                       | m          | –              | –              |
| Jap. <i>ani</i>      | ↑↓                       | m          | ›älter‹        | formlos        |
| Jap. <i>onisan</i>   | ↑↓                       | m          | ›älter‹        | förmlich       |
| Jap. <i>otōto</i>    | ↑↓                       | m          | ›jünger‹       | formlos        |
| Jap. <i>otōtosan</i> | ↑↓                       | m          | ›jünger‹       | förmlich       |

**Tab. 9.1:** Bedeutungskomponenten deutscher und japanischer Ausdrücke für „Bruder“

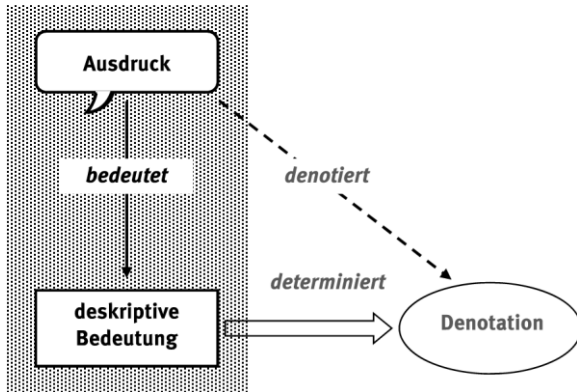

**Abb. 9.1:** Der Schwerpunkt des strukturalistischen Ansatzes

| Onset |                    | Kern                   |                        | Koda                   |                |
|-------|--------------------|------------------------|------------------------|------------------------|----------------|
| /g/   | <i>Guss</i>        | /i/                    | <i>Biss</i>            | /ʃ/                    | <i>Busch</i>   |
| /k/   | <i>Kuss</i>        | /a/                    | <i>Bass</i>            | /m/                    | <i>Bumm</i>    |
| /b/   | /u/ /s/ <b>Bus</b> | /b/ /u/ /s/ <b>Bus</b> | /b/ /u/ /s/ <b>Bus</b> | /b/ /u/ /s/ <b>Bus</b> | <b>Bus</b>     |
| /m/   | <i>muss</i>        | /ɔ/                    | <i>Boss</i>            | /t/                    | <i>Butt</i>    |
| /n/   | <i>Nuss</i>        | /ɛ/                    | <i>besser</i>          | /d/                    | <i>buddeln</i> |
| ...   | ...                | ...                    | ...                    | ...                    | ...            |

**Tab. 9.2:** Die drei durch die Silbe /bus/ definierten Paradigmen

|                                                       |                                                                                                      |
|-------------------------------------------------------|------------------------------------------------------------------------------------------------------|
| <b>Syntagma</b>                                       | zusammengesetzte Einheit                                                                             |
| <b>syntagmatische Beziehungen</b>                     | Beziehungen zwischen den Komponenten eines Syntagmas                                                 |
| <b>syntagmatische (kombinatorische) Eigenschaften</b> | Eigenschaften einer Einheit, die determinieren, wie sie mit anderen Einheiten kombiniert werden kann |
| <b>Paradigma</b>                                      | die alternativen Besetzungen einer Position in einem Syntagma                                        |
| <b>paradigmatische Beziehungen</b>                    | Beziehungen zwischen den Elementen eines Paradigmas                                                  |
| <b>paradigmatische (kontrastive) Eigenschaften</b>    | Eigenschaften einer Einheit, die determinieren, wie sie sich zu den anderen Einheiten verhält        |

**Tab. 9.3:** Strukturalistische Grundbegriffe

| Ausdruck           | Merkmale und ihre Werte |         |             | [MENSCH] | [ERWACHSEN] | [WEIBLICH] |
|--------------------|-------------------------|---------|-------------|----------|-------------|------------|
| <i>Kind</i>        | [+MENSCH]               | [−ERW.] |             | +        | −           |            |
| <i>Junge</i>       | [+MENSCH]               | [−ERW.] | [−WEIBLICH] | +        | −           | −          |
| <i>Mädchen</i>     | [+MENSCH]               | [−ERW.] | [+WEIBLICH] | +        | −           | +          |
| <i>Erwachsener</i> | [+MENSCH]               | [+ERW.] |             | +        | +           |            |
| <i>Mann</i>        | [+MENSCH]               | [+ERW.] | [−WEIBLICH] | +        | +           | −          |
| <i>Frau</i>        | [+MENSCH]               | [+ERW.] | [+WEIBLICH] | +        | +           | +          |

**Tab. 9.4:** Merkmale und Merkmalmatrix für die deutschen Personenbezeichnungen



| Bedeutung von A                            |     | Bedeutung von B            | logische Beziehung      | Bedeutungsbeziehung        |
|--------------------------------------------|-----|----------------------------|-------------------------|----------------------------|
| X und [+α]<br><i>Mädchen</i>               | vs. | Y und [−α]<br><i>Hahn</i>  | inkompatibel            | ( <i>unbestimmt</i> )      |
| X und [+α]<br><i>Mädchen</i>               | vs. | X und [−α]<br><i>Junge</i> | logisch<br>komplementär | semantisch<br>komplementär |
| X und [+α] / [−α]<br><i>Mädchen, Junge</i> | vs. | X<br><i>Kind</i>           | untergeordnet           | hyponym                    |

**Tab. 9.5:** Binäre Merkmale und Bedeutungsbeziehungen

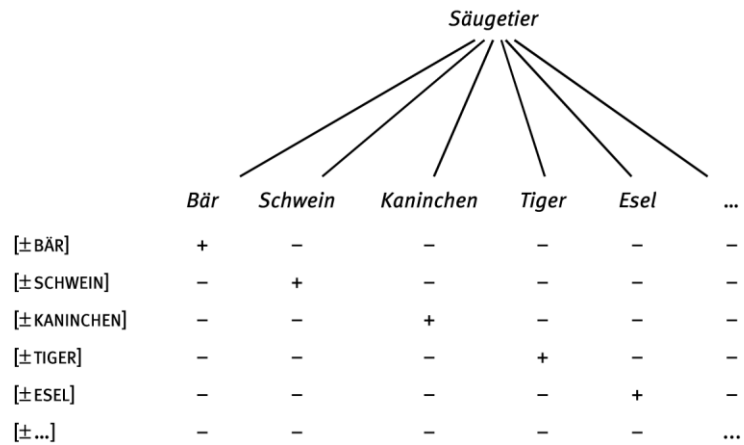

**Abb. 9.2:** Triviale Merkmalmatrix für Kohyponyme der Säugetiertaxonomie

|                      | <i>Vater</i> | <i>Mutter</i> | <i>Bruder</i> | <i>Schwester</i> | <i>Kind</i> | <i>Sohn</i> | <i>Tochter</i> | <i>Onkel</i> | <i>Tante</i> | <i>Cousin</i> | <i>Cousine</i> | <i>Neffe</i> | <i>Nichte</i> |
|----------------------|--------------|---------------|---------------|------------------|-------------|-------------|----------------|--------------|--------------|---------------|----------------|--------------|---------------|
| [DIREKT VERWANDT]    | +            | +             | +             | +                | +           | +           | +              | -            | -            | -             | -              | -            | -             |
| [GLEICHE GENERATION] | -            | -             | +             | +                | -           | -           | -              | -            | -            | +             | +              | -            | -             |
| [ÄLTER]              | +            | +             | -             | -                | -           | -           | -              | +            | +            |               |                | -            | -             |
| [MÄNNLICH]           | +            | -             | +             | -                |             | +           | -              | +            | -            | +             | -              | +            | -             |

**Tab. 9.6:** Merkmalmatrix für deutsche Verwandtschaftsterme nach Bierwisch (1969)

|                  | BMS | Dowty | Jackendoff | Wierzbicka |
|------------------|-----|-------|------------|------------|
| Bedeutungsmodell | +   | +     | +          | +          |
| Reduktion        | (+) | (+)   | (+)        | +          |
| Präzision        | (-) | +     | +          | (-)        |
| Relationen       | (-) | +     | +          | (+)        |
| Komposition      | (-) | +     | +          | (-)        |
| Sprachvergleich  | (-) | (+)   | (+)        | +          |

**Tab. 9.7:** Dekompositionsansätze im Vergleich

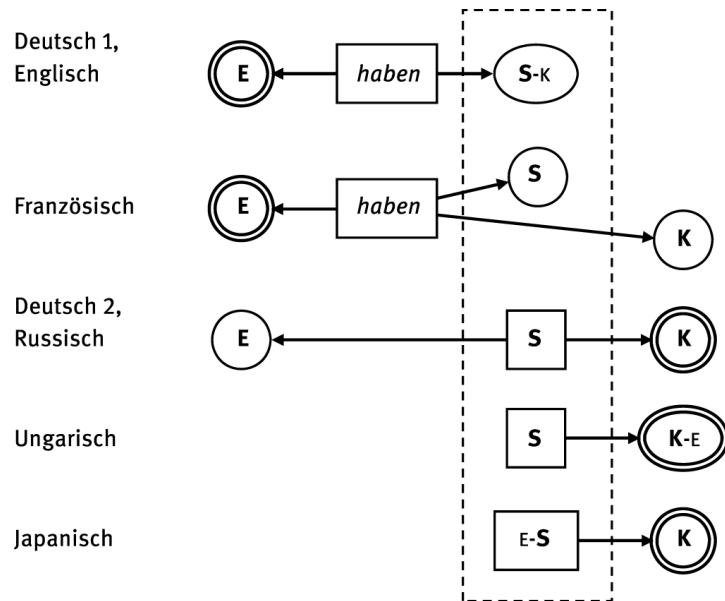

**Abb. 10.1:** Kopfschmerz-Konstruktionen

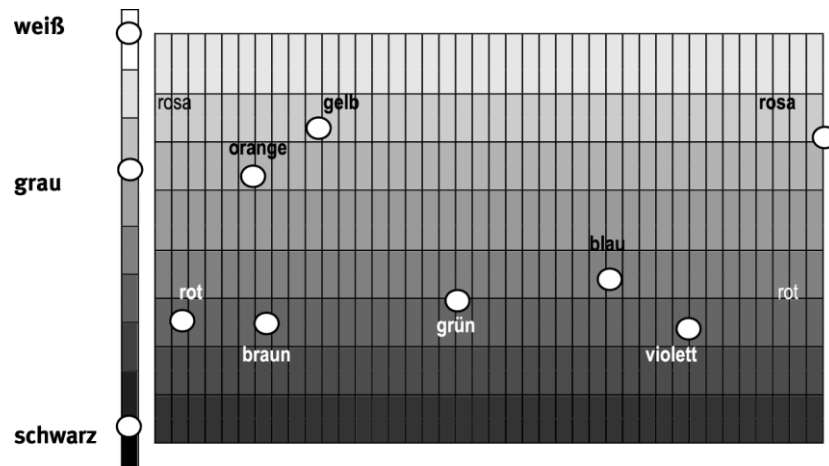

**Abb. 10.2:** Munsell-Farbtafel und Fokalfarben

| Stufe | Grundfarbwörter |         |       |        |        |        |         |                                           |
|-------|-----------------|---------|-------|--------|--------|--------|---------|-------------------------------------------|
| I     | SCHW/2          | WEISS/2 |       |        |        |        |         |                                           |
| II    | SCHW/3          | WEISS/3 | ROT/3 |        |        |        |         |                                           |
| IIIa  | SCHW/4          | WEISS/4 | ROT/4 | GELB/4 |        |        |         |                                           |
| IIIb  | SCHW/4          | WEISS/4 | ROT/4 |        | GRÜN/4 |        |         |                                           |
| IV    | SCHW/5          | WEISS/5 | ROT/5 | GELB/5 | GRÜN/5 |        |         |                                           |
| V     | SCHW/6          | WEISS/6 | ROT/6 | GELB/6 | GRÜN/6 | BLAU/6 |         |                                           |
| VI    | SCHW/7          | WEISS/7 | ROT/7 | GELB/7 | GRÜN/7 | BLAU/7 | BRAUN/7 |                                           |
| VII   | SCHW/+          | WEISS/+ | ROT/+ | GELB/+ | GRÜN/+ | BLAU/+ | BRAUN/+ | GRAU/+<br>ROSA/+<br>ORANGE/+<br>VIOLETT/+ |
| Fokus | Schwarz         | Weiß    | Rot   | Gelb   | Grün   | Blau   | Braun   | Grau etc.                                 |

**Tab. 10.1:** Die sieben Stufen von Farbwortsystemen nach Berlin und Kay

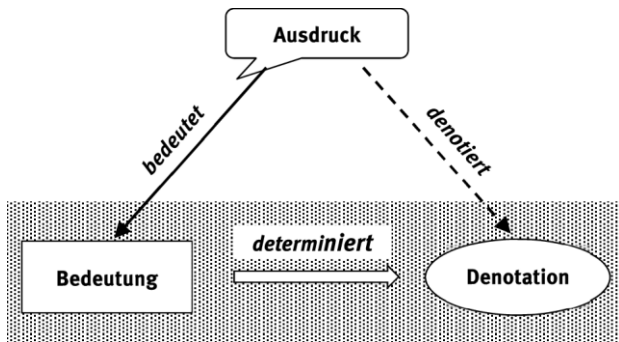

**Abb. 11.1:** Der Schwerpunkt der Kognitiven Semantik



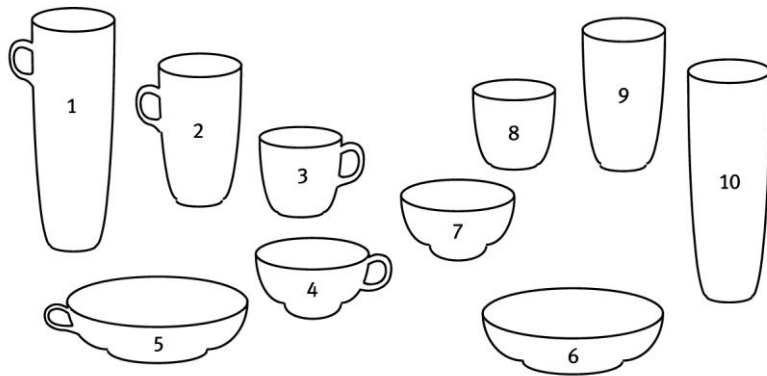

**Abb. 11.2:** Tassen, Schalen und Vasen

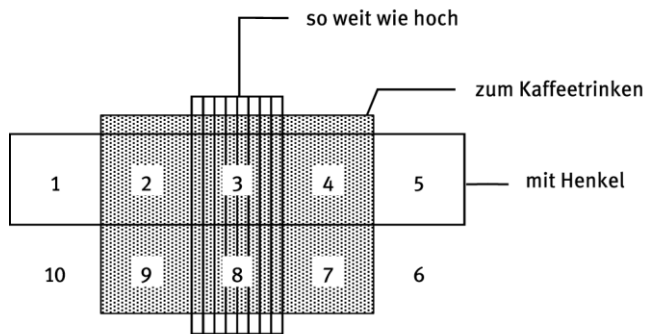

**Abb. 11.3:** Merkmale von Tassen und Familienähnlichkeit

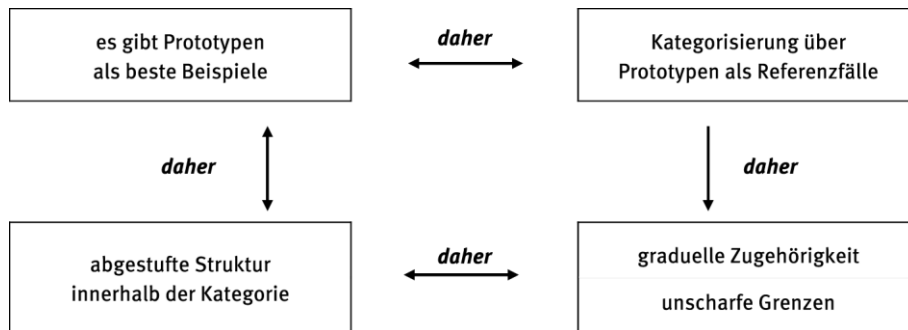

**Abb. 11.4:** Annahmen der Prototypentheorie

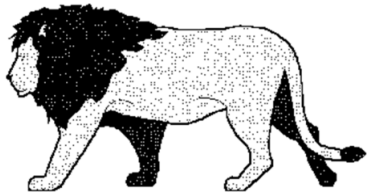

**Abb. 11.5**

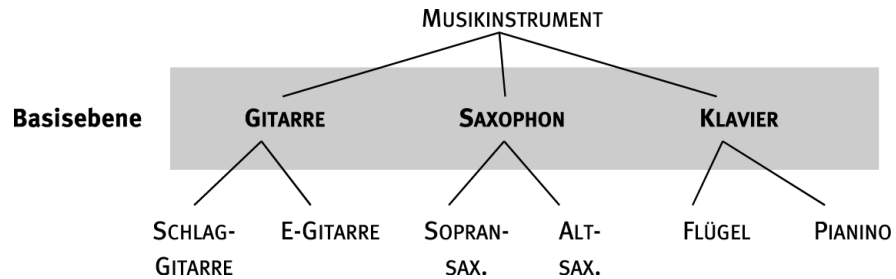

**Abb. 11.6:** Kategorien von Musikinstrumenten und die Basisebene

| übergeordnet      | KLEIDUNGSSTÜCK | FAHRZEUG   | TIER         | FARBE             |
|-------------------|----------------|------------|--------------|-------------------|
| <b>Basisebene</b> | HOSE, JACKE    | FAHRRAD    | MAUS, HASE   | SCHWARZ           |
|                   | HEMD, ROCK     | AUTO, BUS  | HUND, KUH    | WEISS, ROT        |
|                   | KLEID, HUT     | LKW, BOOT  | BIENE, WURM  | GELB, GRÜN        |
|                   | STRUMPF        | KUTSCHE    | QUALLE, BÄR  | BLAU, BRAUN ROSA, |
|                   | MANTEL         | SKATEBOARD | FROSCH, AFFE | GRAU              |
|                   | FRACK, BH      | DREIRAD    | ELEFANT      | LILA, ORANGE      |
| untergeordnet     | BLUEJEANS      | RENNRAD    | FELDMAUS     | ZITRONENGELB      |
|                   | FALTENROCK     | PADDELBOOT | LAUBFROSCH   | PETROL            |

**Tab. 11.1:** Beispiele für die Basisebene

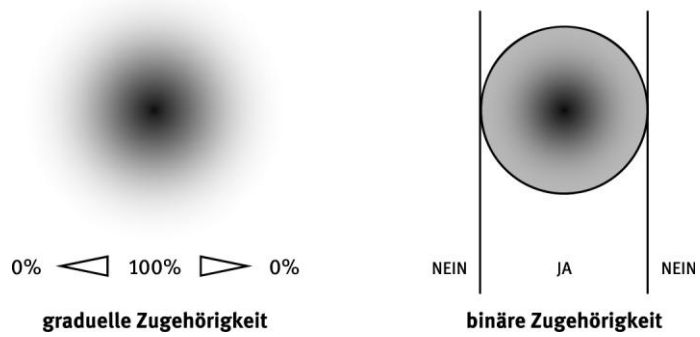

**Abb. 11.7:** Graduelle und binäre Zugehörigkeit bei abgestufter Struktur

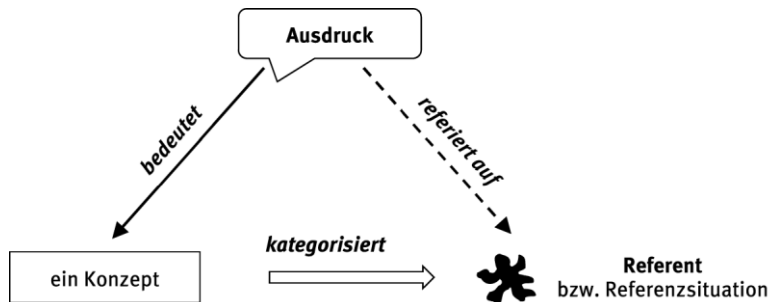

**Abb. 11.8:** Die kognitive Version des semiotischen Dreiecks



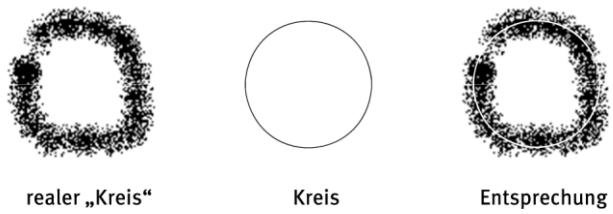

**Abb. 11.9:** Das semantische Konzept und die Realität

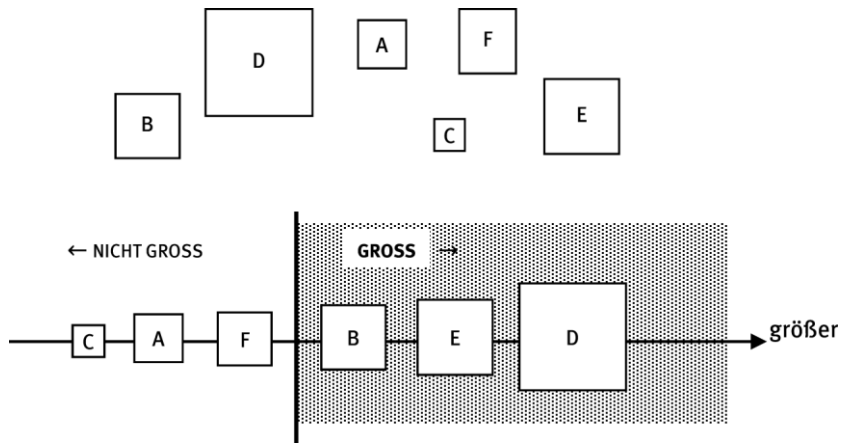

**Abb. 11.10:** Kategorisierung als „groß“

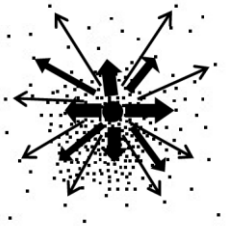

Kategorie auf der Basis von  
Prototyp und Ähnlichkeit

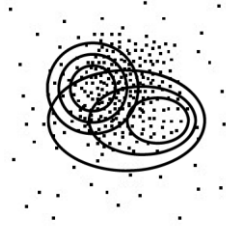

Kategoriencluster auf der  
Basis eines vagen Konzepts

**Abb. 11.11:** Prototypikalität und Vagheit

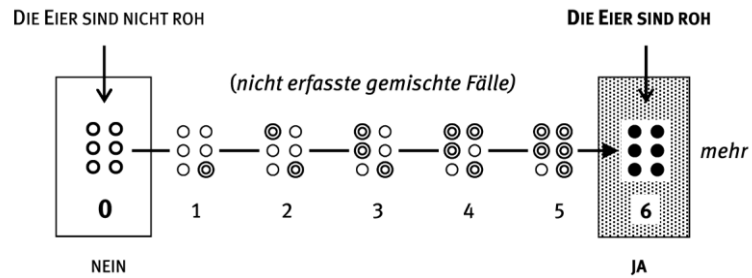

**Abb. 11.12:** Alles-oder-Nichts-Kontrast

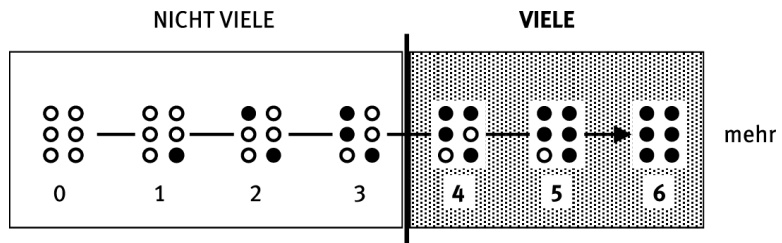

**Abb. 11.13:** Polaritätskontrast bei Quantifikation

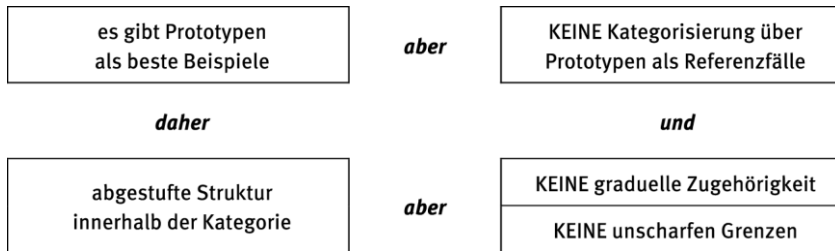

**Abb. 11.14:** Revision der Annahmen der Prototypentheorie

| hervorstechendes spezifisches Merkmal: |                                  | »aus Äpfeln gemacht«                                                                                             |
|----------------------------------------|----------------------------------|------------------------------------------------------------------------------------------------------------------|
| gemeinsame Merkmale:                   |                                  |                                                                                                                  |
| 1                                      | mit SAFT                         | »flüssig«<br>»alkoholfrei«<br>»durstlöschend«<br>»in Flaschen oder Kartons abgefüllt«<br>»aus Gläsern getrunken« |
| 2                                      | mit SAFT und APFEL               | »süß oder süßsauer«<br>»gesund«<br>»wohlschmeckend«                                                              |
| 3                                      | mit APFEL                        | »gelb oder ähnlich gefärbt«<br>»fruchtig«                                                                        |
| 4                                      | mit keiner von beiden Kategorien | »mit Sprudel gemischt«<br>»naturtrüb«                                                                            |

**Tab. 11.2:** Merkmale der Kategorie APFELSAFT nach Ungerer und Schmid (2013)

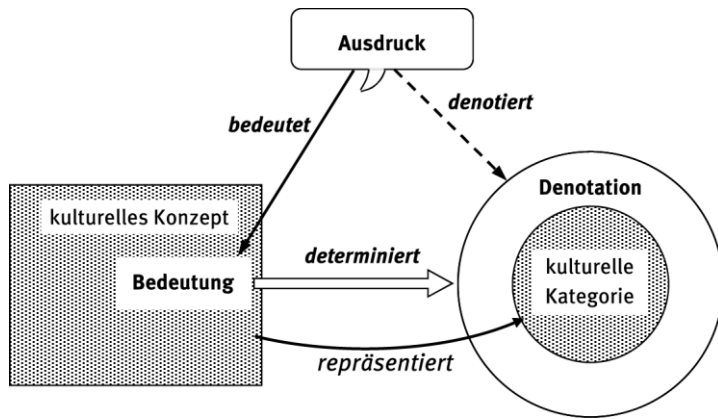

**Abb. 11.15** Kulturelles Wissen im semiotischen Dreieck



|            |                             |                            |
|------------|-----------------------------|----------------------------|
| Inhaberin. | NAME:                       | Postowski                  |
|            | VORNAMEN:                   | Angelika                   |
|            | STAATSANGEHÖRIGKEIT:        | deutsch                    |
|            | GEBURTSTAG:                 | 03.08.1979                 |
|            | GEBURTSORT:                 | Bottrop                    |
|            | GESCHLECHT:                 | F                          |
|            | GRÖSSE:                     | 178 cm                     |
|            | AUGENFARBE:                 | blau                       |
|            | WOHNORT:                    | Köln                       |
|            | UNTERSCHRIFT DER INHABERIN: | <i>(eine Unterschrift)</i> |
|            | [GESICHT]:                  | <i>(ein Foto)</i>          |

**Abb. 12.1:** Framematrix für die Inhaberin eines EU-Reisepasses (1)

|            |                             |                            |        |            |
|------------|-----------------------------|----------------------------|--------|------------|
| Inhaberin. | NAME:                       | Postowski                  |        |            |
|            | VORNAMEN:                   | Angelika                   |        |            |
|            | STAATSANGEHÖRIGKEIT:        | deutsch                    |        |            |
|            | [GEBURT]:                   | (Geburt der Inhaberin).    | TAG:   | 03.08.1979 |
|            |                             |                            | ORT:   | Bottrop    |
|            | GESCHLECHT:                 | F                          |        |            |
|            | GRÖSSE:                     | 178 cm                     |        |            |
|            | [AUGEN]:                    | (Augen der Inhaberin).     | FARBE: | blau       |
|            | WOHNORT:                    | Köln                       |        |            |
|            | UNTERSCHRIFT DER INHABERIN: | <i>(eine Unterschrift)</i> |        |            |
|            | [GESICHT]:                  | <i>(ein Foto)</i>          |        |            |

**Abb. 12.2:** Framematrix für die Inhaberin eines EU-Reisepasses (2)

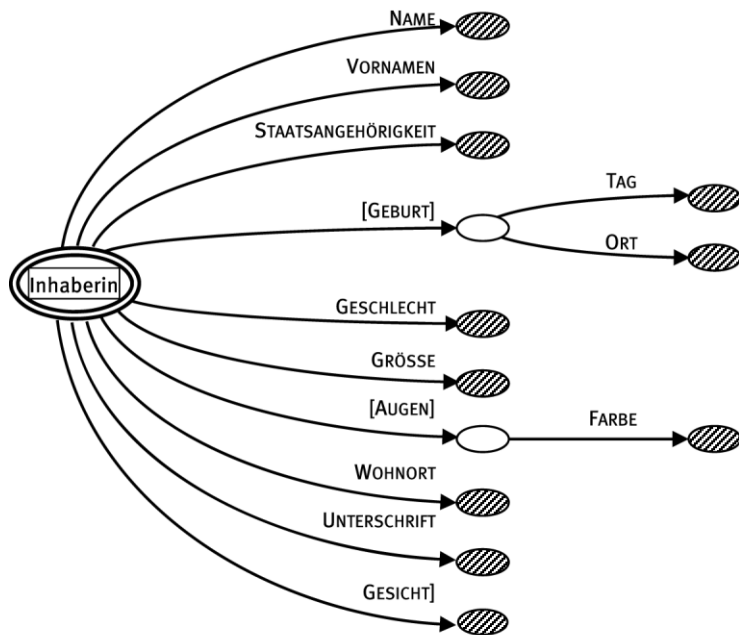

**Abb. 12.3:** Der Reisepassframe als Graph

|                    |                                                                                                                                           |            |      |  |      |  |                  |
|--------------------|-------------------------------------------------------------------------------------------------------------------------------------------|------------|------|--|------|--|------------------|
| Reisepass. TYP:    | P                                                                                                                                         |            |      |  |      |  |                  |
| AUSSTELLUNGSDATUM: | 16.03.2012                                                                                                                                |            |      |  |      |  |                  |
| GÜLTIG BIS:        | 15.03.2022                                                                                                                                |            |      |  |      |  |                  |
| BEHÖRDE:           | Stadt Köln                                                                                                                                |            |      |  |      |  |                  |
| [INHABERIN]:       | <table> <tr> <td>Inhaberin.</td><td>....</td></tr> <tr> <td></td><td>....</td></tr> <tr> <td></td><td>(vgl. Abb. 12.2)</td></tr> </table> | Inhaberin. | .... |  | .... |  | (vgl. Abb. 12.2) |
| Inhaberin.         | ....                                                                                                                                      |            |      |  |      |  |                  |
|                    | ....                                                                                                                                      |            |      |  |      |  |                  |
|                    | (vgl. Abb. 12.2)                                                                                                                          |            |      |  |      |  |                  |

**Abb. 12.4:** Framematrix für einen EU-Reisepass

|                       |              |                    |
|-----------------------|--------------|--------------------|
| Lexem <i>Lehrer</i> . | LAUTFORM:    | /le:rər/           |
|                       | AUSSPRACHE:  | [le:ɐ̯]            |
|                       | SCHREIBUNG:  | „Lehrer“           |
|                       | BEDEUTUNG:   | ›Lehrer‹           |
|                       | WORTART:     | relationales Nomen |
|                       | GENUS:       | Maskulinum         |
|                       | ZÄHLBARKEIT: | zählbar            |

**Abb. 12.5:** Framematrix für das Lexem *Lehrer*

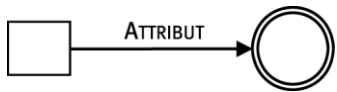

**Abb. 12.6:** Frame für ein Attributkonzept

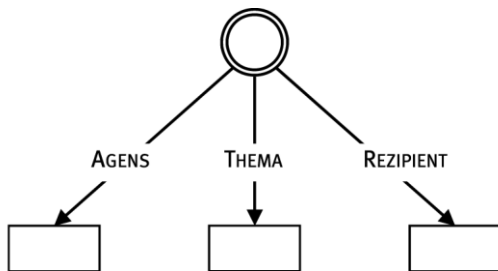

**Abb. 12.7:** Framegraph für die Argumentstruktur eines ditransitiven Verbs

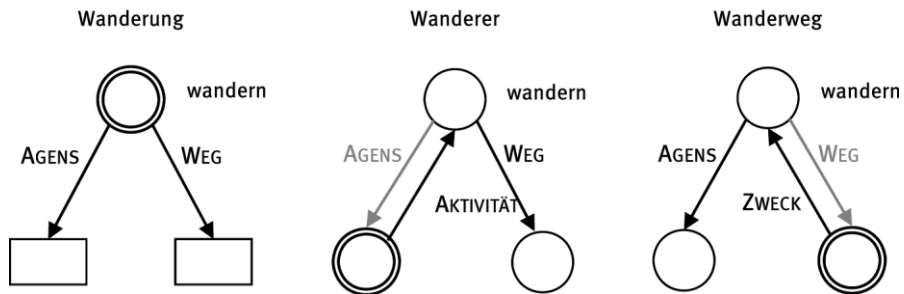

**Abb. 12.8:** Framegraphen für drei von dem Verb *wandern* abgeleitete Nomen



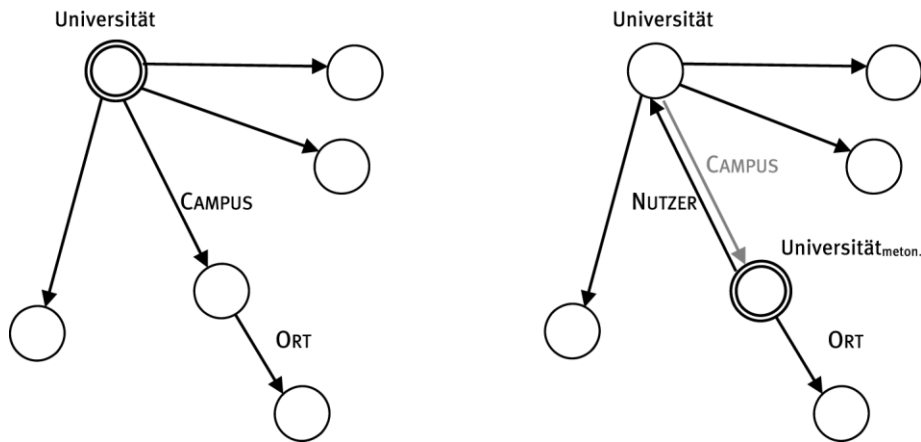

**Abb. 12.9:** Metonymische Verschiebung von ›Universität‹ zu ›Campus‹

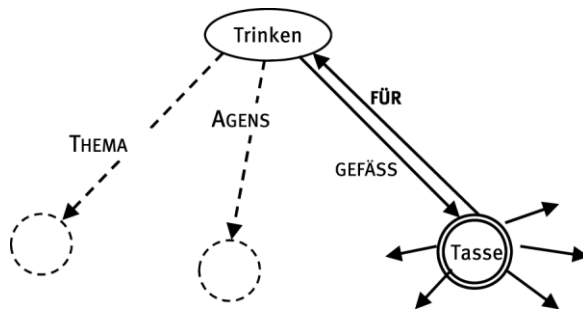

**Abb. 12.10:** Frame für ›Tasse‹ mit Trink-Affordanz

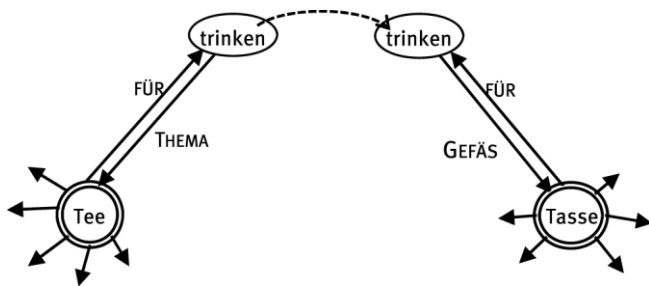

**Abb. 12.11:** Unifikation der Frames für ›Tee‹ und ›Tasse‹

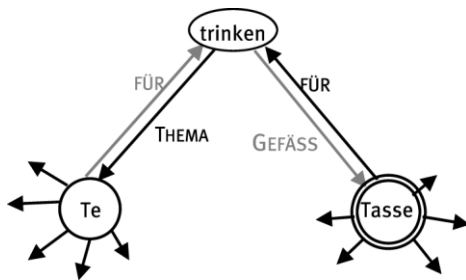

**Abb. 12.12:** Framegraph für ›Teetasse‹

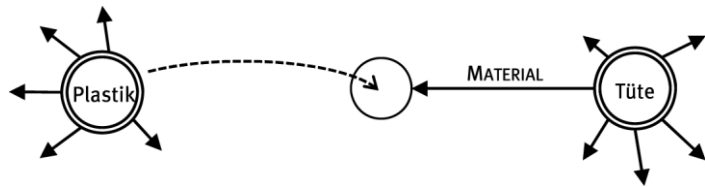

**Abb. 12.13:** Unifikation der Frames für ›Plastiktüte‹

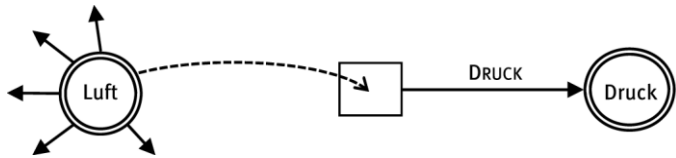

**Abb. 12.14:** Unifikation der Frames für ›Luftdruck‹

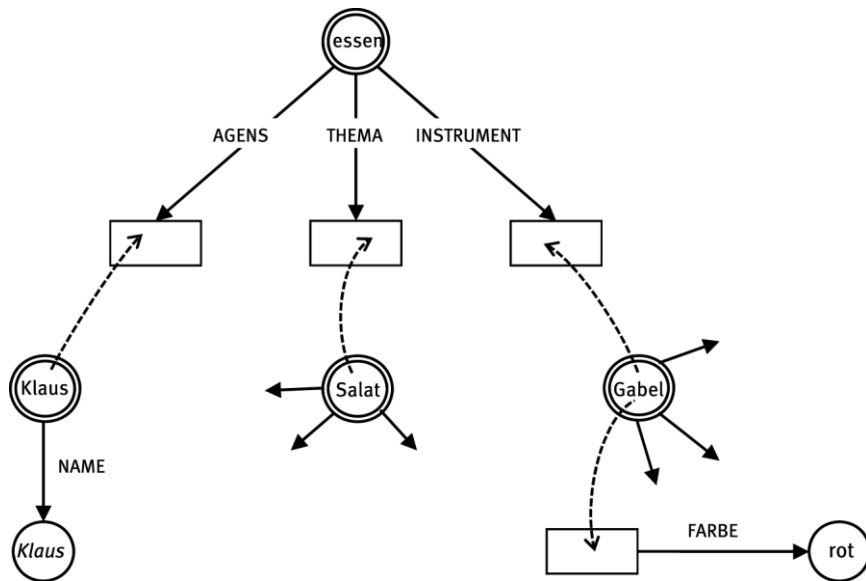

**Abb. 12.15:** Die Frames für ›Klaus aß den Salat mit einer roten Gabel‹ vor der Unifikation

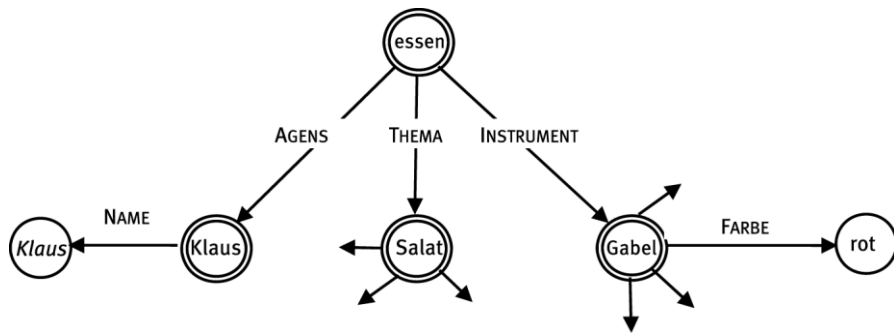

**Abb. 12.16:** Der Frame für ›Klaus aß den Salat mit einer roten Gabel‹



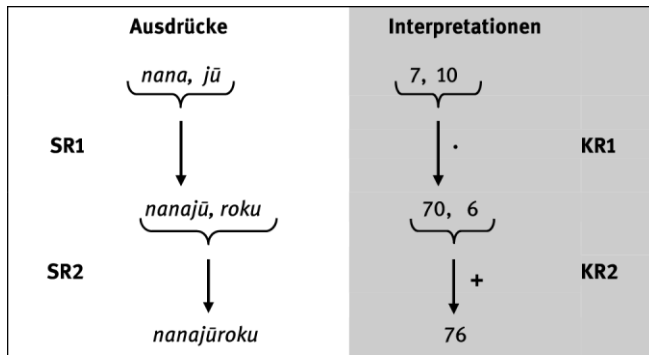

**Abb. 13.1:** Bildung und kompositionale Interpretation von *nana jūroku*

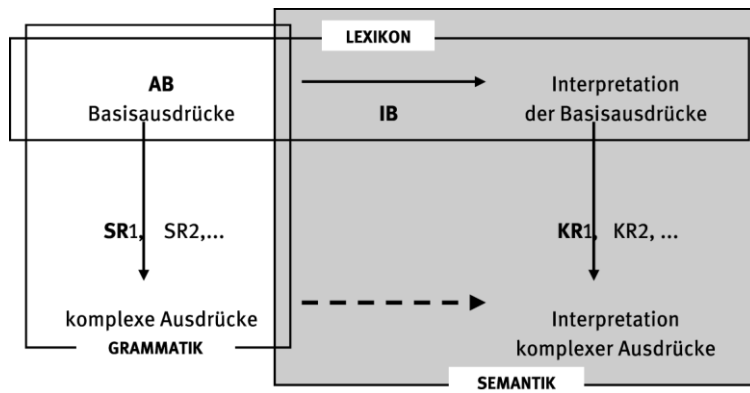

**Abb. 13.2:** Allgemeines Schema der kompositionalen Semantik

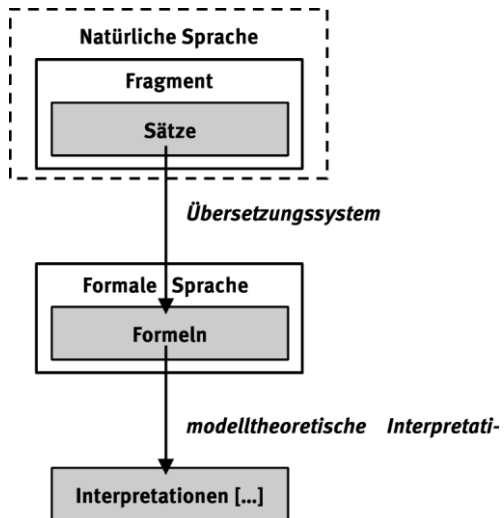

**Abb. 13.3:** Zweistufige Interpretationszuweisung in der Formalen Semantik

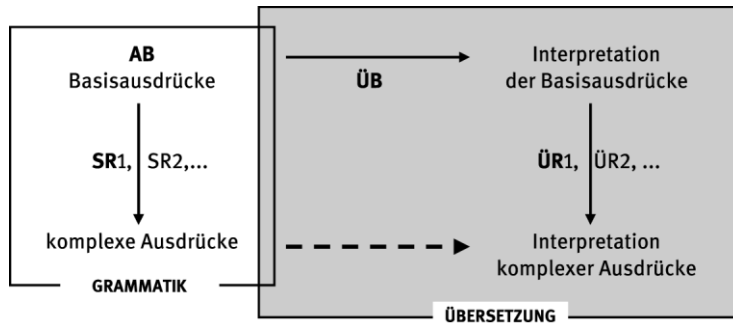

**Abb. 13.4:** Allgemeines Schema eines Übersetzungssystems

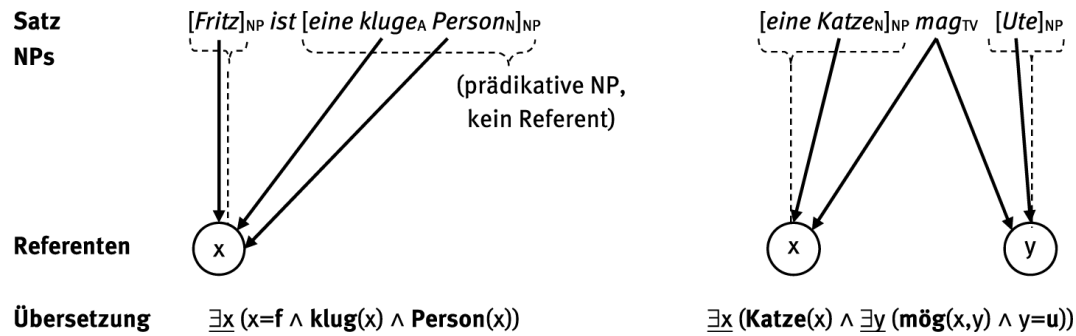

**Abb. 13.5:** Referenten und Argumente zweier Beispielsätze

| PERSON/KLUG | KATZE     | DÜNN/REIZBAR | RAUCH     | STUDIER   |
|-------------|-----------|--------------|-----------|-----------|
| Bobby → 0   | Bobby → 0 | Bobby → 0    | Bobby → 0 | Bobby → 0 |
| Fritz → 0   | Fritz → 1 | Fritz → 1    | Fritz → 0 | Fritz → 0 |
| Klaus → 1   | Klaus → 0 | Klaus → 1    | Klaus → 1 | Klaus → 0 |
| Ute → 1     | Ute → 0   | Ute → 0      | Ute → 0   | Ute → 1   |

**Tab. 13.1:** Die fünf einstelligen m-Prädikate des Modells

| Kategorie      | Individuenterm    | Prädikatskonstante                                                                                                | Aussage              |
|----------------|-------------------|-------------------------------------------------------------------------------------------------------------------|----------------------|
| Ausdruck       | f                 | klug                                                                                                              | studier(f)           |
| Interpretation | <div>Fritz</div>  | <div>           Bobby → 0<br/>           Fritz → 0<br/>           Klaus → 1<br/>           Ute → 1         </div> | <div>0</div>         |
| Typ            | <i>Individuum</i> | <i>m-Prädikat</i>                                                                                                 | <i>Wahrheitswert</i> |

**Tab. 13.2:** Kategorien von Ausdrücken und Typen von Interpretationen

| Welt                | Proposition von S, $\llbracket S \rrbracket$ |       |       |       |       |       |     |
|---------------------|----------------------------------------------|-------|-------|-------|-------|-------|-----|
|                     | $w_1$                                        | $w_2$ | $w_3$ | $w_4$ | $w_5$ | $w_6$ | ... |
| Wahrheitswert von S | 0                                            | 0     | 1     | 0     | 1     | 1     | ... |

**Abb. 13.6:** Eine Proposition in der Mögliche-Welten-Semantik



| Ausdruck           | Intension                 | Extension in Welt $w$       |
|--------------------|---------------------------|-----------------------------|
| E                  | $\llbracket E \rrbracket$ | $\llbracket E \rrbracket^w$ |
| Satz               | Proposition               | Wahrheitswert               |
| Individuenausdruck | Individuenkonzept         | Individuum in U             |
| Prädikatsausdruck  | Eigenschaft, Relation     | m-Prädikat in $w$           |

**Tab. 13.3:** Intensionen und Extensionen

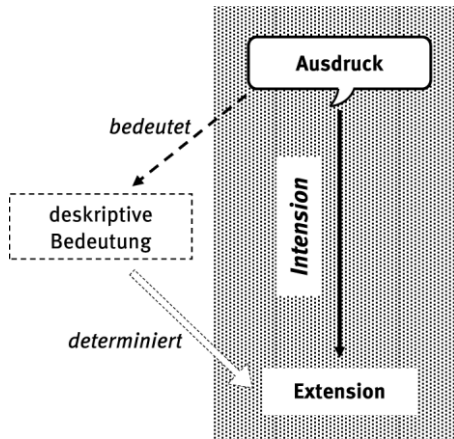

**Abb. 13.7:** Das semiotische „Dreieck“ für die Mögliche-Welten-Semantik
